# Supplementary material for: Evolutionary Characterization of the Short Protein SPAAR
Source: Genes (Basel). 2021 Nov 24;12(12):1864. doi: 10.3390/genes12121864 (PMC8702040; doi:10.3390/genes12121864)
Supplement: Supplementary file 1 [file genes-12-01864-s001.zip › Supplementary Tables - revised.xlsx]

## Sheet: Table S1
Table S1: Genome assemblies assessed for presence of syntenic block to SPAAR
Common Name	Scientific Name	ID	Ensembl Assembly	GENBANK Accession	Mammal	Placental	Aligned to SPAAR
Spiny chromis	Acanthochromis polyacanthus	80966	ASM210954v1	GCA_002109545.1	FALSE	FALSE	FALSE
Eurasian sparrowhawk	Accipiter nisus	211598	Accipiter_nisus_ver1.0	GCA_004320145.1	FALSE	FALSE	FALSE
Yellow-billed parrot	Amazona collaria	241587	ASM394721v1	GCA_003947215.1	FALSE	FALSE	FALSE
Midas cichlid	Amphilophus citrinellus	61819	Midas_v5	GCA_000751415.1	FALSE	FALSE	FALSE
Clown anemonefish	Amphiprion ocellaris	80972	AmpOce1.0	GCA_002776465.1	FALSE	FALSE	FALSE
Orange clownfish	Amphiprion percula	161767	Nemo_v1	GCA_003047355.1	FALSE	FALSE	FALSE
Climbing perch	Anabas testudineus	64144	fAnaTes1.2	GCA_900324465.2	FALSE	FALSE	FALSE
Mallard	Anas platyrhynchos	8839	ASM874695v1	GCA_008746955.1	FALSE	FALSE	FALSE
Duck	Anas platyrhynchos platyrhynchos	8840	CAU_duck1.0	GCA_002743455.1	FALSE	FALSE	FALSE
Eastern spot-billed duck	Anas zonorhyncha	75864	ASM222487v1	GCA_002224875.1	FALSE	FALSE	FALSE
Anole lizard	Anolis carolinensis	28377	AnoCar2.0	GCA_000090745.1	FALSE	FALSE	FALSE
Pink-footed goose	Anser brachyrhynchus	132585	ASM259213v1	GCA_002592135.1	FALSE	FALSE	FALSE
Swan goose	Anser cygnoides	8845	GooseV1.0	GCA_002166845.1	FALSE	FALSE	FALSE
Ma's night monkey	Aotus nancymaae	37293	Anan_2.0	GCA_000952055.2	TRUE	TRUE	TRUE
Great spotted kiwi	Apteryx haastii	8823	aptHaa1	GCA_003342985.1	FALSE	FALSE	FALSE
Little spotted kiwi	Apteryx owenii	8824	aptOwe1	GCA_003342965.1	FALSE	FALSE	FALSE
Okarito brown kiwi	Apteryx rowi	308060	aptRow1	GCA_003343035.1	FALSE	FALSE	FALSE
Golden eagle	Aquila chrysaetos chrysaetos	223781	bAquChr1.2	GCA_900496995.2	FALSE	FALSE	FALSE
Eastern happy	Astatotilapia calliptera	8154	fAstCal1.2	GCA_900246225.3	FALSE	FALSE	FALSE
Mexican tetra	Astyanax mexicanus	7994	Astyanax_mexicanus-2.0	GCA_000372685.2	FALSE	FALSE	FALSE
Burrowing owl	Athene cunicularia	194338	athCun1	GCA_003259725.1	FALSE	FALSE	FALSE
Blue whale	Balaenoptera musculus	9771	mBalMus1.v2	GCA_009873245.2	TRUE	TRUE	TRUE
Siamese fighting fish	Betta splendens	158456	fBetSpl5.2	GCA_900634795.2	FALSE	FALSE	FALSE
American bison	Bison bison bison	43346	Bison_UMD1.0	GCA_000754665.1	TRUE	TRUE	TRUE
Domestic yak	Bos grunniens	30521	LU_Bosgru_v3.0	GCA_005887515.1	TRUE	TRUE	TRUE
Hybrid - Bos Indicus	Bos indicus x Bos taurus	30522	UOA_Brahman_1	GCA_003369695.2	TRUE	TRUE	TRUE
Wild yak	Bos mutus	72004	BosGru_v2.0	GCA_000298355.1	TRUE	TRUE	TRUE
Cow	Bos taurus	9913	ARS-UCD1.2	GCA_002263795.2	TRUE	TRUE	TRUE
Eurasian eagle-owl	Bubo bubo	30461	BubBub1.0	GCA_010303855.1	FALSE	FALSE	FALSE
Eastern buzzard	Buteo japonicus	224669	ButJap1.0	GCA_010312235.1	FALSE	FALSE	FALSE
Muscovy Duck (domestic type)	Cairina moschata domestica	1240228	CaiMos1.0	GCA_009194515.1	FALSE	FALSE	FALSE
Ruff	Calidris pugnax	198806	ASM143184v1	GCA_001431845.1	FALSE	FALSE	FALSE
Spoon-billed sandpiper	Calidris pygmaea	425635	ASM369795v1	GCA_003697955.1	FALSE	FALSE	FALSE
Marmoset	Callithrix jacchus	9483	ASM275486v1	GCA_002754865.1	TRUE	TRUE	TRUE
Elephant shark	Callorhinchus milii	7868	Callorhinchus_milii-6.1.3	GCA_000165045.2	FALSE	FALSE	FALSE
Small tree finch	Camarhynchus parvulus	87175	STF_HiC	GCA_901933205.1	FALSE	FALSE	FALSE
Arabian camel	Camelus dromedarius	9838	CamDro2	GCA_000803125.2	TRUE	TRUE	TRUE
Dingo	Canis lupus dingo	286419	ASM325472v1	GCA_003254725.1	TRUE	TRUE	TRUE
Dog	Canis lupus familiaris	9615	CanFam3.1	GCA_000002285.2	TRUE	TRUE	TRUE
Goat	Capra hircus	9925	ARS1	GCA_001704415.1	TRUE	TRUE	TRUE
Goldfish	Carassius auratus	7957	ASM336829v1	GCA_003368295.1	FALSE	FALSE	FALSE
Tarsier	Carlito syrichta	1868482	Tarsius_syrichta-2.0.1	GCA_000164805.2	TRUE	TRUE	TRUE
American beaver	Castor canadensis	51338	C.can_genome_v1.0	GCA_001984765.1	TRUE	TRUE	TRUE
Chacoan peccary	Catagonus wagneri	51154	CatWag_v2_BIUU_UCD	GCA_004024745.2	TRUE	TRUE	TRUE
Swainson's thrush	Catharus ustulatus	91951	bCatUst1.pri	GCA_009819885.1	FALSE	FALSE	FALSE
Brazilian guinea pig	Cavia aperea	37548	CavAp1.0	GCA_000688575.1	TRUE	TRUE	TRUE
Guinea Pig	Cavia porcellus	10141	Cavpor3.0	GCA_000151735.1	TRUE	TRUE	TRUE
Capuchin	Cebus capucinus imitator	1737458	Cebus_imitator-1.0	GCA_001604975.1	TRUE	TRUE	TRUE
Sooty mangabey	Cercocebus atys	9531	Caty_1.0	GCA_000955945.1	TRUE	TRUE	TRUE
Yarkand deer	Cervus hanglu yarkandensis	84702	CEY_v1	GCA_010411085.1	TRUE	TRUE	TRUE
Abingdon island giant tortoise	Chelonoidis abingdonii	106734	ASM359739v1	GCA_003597395.1	FALSE	FALSE	FALSE
Common snapping turtle	Chelydra serpentina	8475	Chelydra_serpentina-1.0	GCA_007922165.1	FALSE	FALSE	FALSE
Long-tailed chinchilla	Chinchilla lanigera	34839	ChiLan1.0	GCA_000276665.1	TRUE	TRUE	TRUE
Vervet-AGM	Chlorocebus sabaeus	60711	ChlSab1.1	GCA_000409795.2	TRUE	TRUE	TRUE
Painted turtle	Chrysemys picta bellii	8478	Chrysemys_picta_bellii-3.0.3	GCA_000241765.2	FALSE	FALSE	FALSE
Golden pheasant	Chrysolophus pictus	9089	Chrysolophus_pictus_GenomeV1.0	GCA_003413605.1	FALSE	FALSE	FALSE
C.intestinalis	Ciona intestinalis	7719	KH	GCA_000224145.1	FALSE	FALSE	FALSE
C.savignyi	Ciona savignyi	51511	CSAV 2.0	-	FALSE	FALSE	FALSE
Atlantic herring	Clupea harengus	7950	Ch_v2.0.2	GCA_900700415.1	FALSE	FALSE	FALSE
Angola colobus	Colobus angolensis palliatus	336983	Cang.pa_1.0	GCA_000951035.1	TRUE	TRUE	TRUE
New Caledonian crow	Corvus moneduloides	1196302	UO_Cmon_1.0	GCA_009650515.1	FALSE	FALSE	FALSE
Channel bull blenny	Cottoperca gobio	56716	fCotGob3.1	GCA_900634415.1	FALSE	FALSE	FALSE
Japanese quail	Coturnix japonica	93934	Coturnix_japonica_2.0	GCA_001577835.1	FALSE	FALSE	FALSE
Chinese hamster CHOK1GS	Cricetulus griseus	10029	CHOK1GS_HDv1	GCA_900186095.1	TRUE	TRUE	TRUE
Australian saltwater crocodile	Crocodylus porosus	8502	CroPor_comp1	GCA_001723895.1	FALSE	FALSE	FALSE
Blue tit	Cyanistes caeruleus	156563	cyaCae2	GCA_002901205.1	FALSE	FALSE	FALSE
Rufous-capped babbler	Cyanoderma ruficeps	181631	ASM869450v1	GCA_008694505.1	FALSE	FALSE	FALSE
Lumpfish	Cyclopterus lumpus	8103	fCycLum1.pri	GCA_009769545.1	FALSE	FALSE	FALSE
Tongue sole	Cynoglossus semilaevis	244447	Cse_v1.0	GCA_000523025.1	FALSE	FALSE	FALSE
Sheepshead minnow	Cyprinodon variegatus	28743	C_variegatus-1.0	GCA_000732505.1	FALSE	FALSE	FALSE
Common carp	Cyprinus carpio	7962	common_carp_genome	GCA_000951615.2	FALSE	FALSE	FALSE
Zebrafish	Danio rerio	7955	GRCz11	GCA_000002035.4	FALSE	FALSE	FALSE
Armadillo	Dasypus novemcinctus	9361	Dasnov3.0	GCA_000208655.2	TRUE	TRUE	TRUE
Beluga whale	Delphinapterus leucas	9749	ASM228892v3	GCA_002288925.3	TRUE	TRUE	TRUE
Denticle herring	Denticeps clupeoides	299321	fDenClu1.1	GCA_900700375.1	FALSE	FALSE	FALSE
European seabass	Dicentrarchus labrax	13489	seabass_V1.0	GCA_000689215.1	FALSE	FALSE	FALSE
Kangaroo rat	Dipodomys ordii	10020	Dord_2.0	GCA_000151885.2	TRUE	TRUE	TRUE
Emu	Dromaius novaehollandiae	8790	droNov1	GCA_003342905.1	FALSE	FALSE	FALSE
Live sharksucker	Echeneis naucrates	173247	fEcheNa1.1	GCA_900963305.1	FALSE	FALSE	FALSE
Electric eel	Electrophorus electricus	8005	Ee_SOAP_WITH_SSPACE	GCA_003665695.2	FALSE	FALSE	FALSE
Hagfish	Eptatretus burgeri	7764	Eburgeri_3.2	GCA_900186335.2	FALSE	FALSE	FALSE
Donkey	Equus asinus asinus	83772	ASM303372v1	GCA_003033725.1	TRUE	TRUE	TRUE
Horse	Equus caballus	9796	EquCab3.0	GCA_002863925.1	TRUE	TRUE	TRUE
Reedfish	Erpetoichthys calabaricus	27687	fErpCal1.1	GCA_900747795.2	FALSE	FALSE	FALSE
Gouldian finch	Erythrura gouldiae	44316	GouldianFinch	GCA_003676055.1	FALSE	FALSE	FALSE
Northern pike	Esox lucius	8010	Eluc_v4	GCA_004634155.1	FALSE	FALSE	FALSE
Common kestrel	Falco tinnunculus	100819	FalTin1.0	GCA_010332995.1	FALSE	FALSE	FALSE
Cat	Felis catus	9685	Felis_catus_9.0	GCA_000181335.4	TRUE	TRUE	TRUE
Flycatcher	Ficedula albicollis	59894	FicAlb_1.4	GCA_000247815.1	FALSE	FALSE	FALSE
Damara mole rat	Fukomys damarensis	885580	DMR_v1.0	GCA_000743615.1	TRUE	TRUE	TRUE
Mummichog	Fundulus heteroclitus	8078	Fundulus_heteroclitus-3.0.2	GCA_000826765.1	FALSE	FALSE	FALSE
Atlantic cod	Gadus morhua	8049	gadMor3.0	GCA_902167405.1	FALSE	FALSE	FALSE
Chicken	Gallus gallus	9031	GRCg6a	GCA_000002315.5	FALSE	FALSE	FALSE
Western mosquitofish	Gambusia affinis	33528	ASM309773v1	GCA_003097735.1	FALSE	FALSE	FALSE
Stickleback	Gasterosteus aculeatus	69293	BROAD S1	-	FALSE	FALSE	FALSE
Medium ground-finch	Geospiza fortis	48883	GeoFor_1.0	GCA_000277835.1	FALSE	FALSE	FALSE
Agassiz's desert tortoise	Gopherus agassizii	38772	ASM289641v1	GCA_002896415.1	FALSE	FALSE	FALSE
Goodes thornscrub tortoise	Gopherus evgoodei	1825980	rGopEvg1_v1.p	GCA_007399415.1	FALSE	FALSE	FALSE
Gorilla	Gorilla gorilla gorilla	9595	gorGor4	GCA_000151905.3	TRUE	TRUE	TRUE
Blunt-snouted clingfish	Gouania willdenowi	441366	fGouWil2.1	GCA_900634775.1	FALSE	FALSE	FALSE
Burton's mouthbrooder	Haplochromis burtoni	8153	AstBur1.0	GCA_000239415.1	FALSE	FALSE	FALSE
Naked mole-rat male	Heterocephalus glaber	10181	HetGla_1.0	GCA_000230445.1	TRUE	TRUE	TRUE
Tiger tail seahorse	Hippocampus comes	109280	H_comes_QL1_v1	GCA_001891065.1	FALSE	FALSE	FALSE
Huchen	Hucho hucho	62062	ASM331708v1	GCA_003317085.1	FALSE	FALSE	FALSE
Channel catfish	Ictalurus punctatus	7998	IpCoco_1.2	GCA_001660625.1	FALSE	FALSE	FALSE
Squirrel	Ictidomys tridecemlineatus	43179	SpeTri2.0	GCA_000236235.1	TRUE	TRUE	TRUE
Lesser Egyptian jerboa	Jaculus jaculus	51337	JacJac1.0	GCA_000280705.1	TRUE	TRUE	TRUE
Dark-eyed junco	Junco hyemalis	40217	ASM382977v1	GCA_003829775.1	FALSE	FALSE	FALSE
Mangrove rivulus	Kryptolebias marmoratus	37003	ASM164957v1	GCA_001649575.1	FALSE	FALSE	FALSE
Ballan wrasse	Labrus bergylta	56723	BallGen_V1	GCA_900080235.1	FALSE	FALSE	FALSE
Large yellow croaker	Larimichthys crocea	215358	L_crocea_2.0	GCA_000972845.2	FALSE	FALSE	FALSE
Barramundi perch	Lates calcarifer	8187	ASB_HGAPassembly_v1	GCA_900066035.1	FALSE	FALSE	FALSE
Blue-ringed sea krait	Laticauda laticaudata	8630	latLat_1.0	GCA_004320025.1	FALSE	FALSE	FALSE
Coelacanth	Latimeria chalumnae	7897	LatCha1	GCA_000225785.1	FALSE	FALSE	FALSE
Blue-crowned manakin	Lepidothrix coronata	321398	Lepidothrix_coronata-1.0	GCA_001604755.1	FALSE	FALSE	FALSE
Spotted gar	Lepisosteus oculatus	7918	LepOcu1	GCA_000242695.1	FALSE	FALSE	FALSE
Leishan spiny toad	Leptobrachium leishanense	445787	ASM966780v1	GCA_009667805.1	FALSE	FALSE	FALSE
Bengalese finch	Lonchura striata domestica	299123	LonStrDom1	GCA_002197715.1	FALSE	FALSE	FALSE
Elephant	Loxodonta africana	9785	Loxafr3.0	GCA_000001905.1	TRUE	TRUE	TRUE
Crab-eating macaque	Macaca fascicularis	9541	Macaca_fascicularis_6.0	GCA_011100615.1	TRUE	TRUE	TRUE
Macaque	Macaca mulatta	9544	Mmul_10	GCA_003339765.3	TRUE	TRUE	TRUE
Pig-tailed macaque	Macaca nemestrina	9545	Mnem_1.0	GCA_000956065.1	TRUE	TRUE	TRUE
Superb fairywren	Malurus cyaneus samueli	2593467	mCya_1.0	GCA_009741485.1	FALSE	FALSE	FALSE
Golden-collared manakin	Manacus vitellinus	328815	ASM171598v2	GCA_001715985.2	FALSE	FALSE	FALSE
Drill	Mandrillus leucophaeus	9568	Mleu.le_1.0	GCA_000951045.1	TRUE	TRUE	TRUE
Alpine marmot	Marmota marmota marmota	9994	marMar2.1	GCA_001458135.1	TRUE	TRUE	TRUE
Zig-zag eel	Mastacembelus armatus	205130	fMasArm1.2	GCA_900324485.2	FALSE	FALSE	FALSE
Zebra mbuna	Maylandia zebra	106582	M_zebra_UMD2a	GCA_000238955.5	FALSE	FALSE	FALSE
Turkey	Meleagris gallopavo	9103	Turkey_2.01	GCA_000146605.1	FALSE	FALSE	FALSE
Budgerigar	Melopsittacus undulatus	13146	Melopsittacus_undulatus_6.3	GCA_000238935.1	FALSE	FALSE	FALSE
Mongolian gerbil	Meriones unguiculatus	10047	MunDraft-v1.0	GCA_002204375.1	TRUE	TRUE	TRUE
Golden Hamster	Mesocricetus auratus	10036	MesAur1.0	GCA_000349665.1	TRUE	TRUE	TRUE
Mouse Lemur	Microcebus murinus	30608	Mmur_3.0	GCA_000165445.3	TRUE	TRUE	TRUE
Prairie vole	Microtus ochrogaster	79684	MicOch1.0	GCA_000317375.1	TRUE	TRUE	TRUE
Ocean sunfish	Mola mola	94237	ASM169857v1	GCA_001698575.1	FALSE	FALSE	FALSE
Opossum	Monodelphis domestica	13616	ASM229v1	GCA_000002295.1	TRUE	FALSE	FALSE
Narwhal	Monodon monoceros	40151	NGI_Narwhal_1	GCA_005190385.2	TRUE	TRUE	TRUE
Swamp eel	Monopterus albus	43700	M_albus_1.0	GCA_001952655.1	FALSE	FALSE	FALSE
Siberian musk deer	Moschus moschiferus	68415	MosMos_v2_BIUU_UCD	GCA_004024705.2	TRUE	TRUE	TRUE
Ryukyu mouse	Mus caroli	10089	CAROLI_EIJ_v1.1	GCA_900094665.2	TRUE	TRUE	TRUE
Mouse	Mus musculus	10090	GRCm39	GCA_000001635.9	TRUE	TRUE	TRUE
Shrew mouse	Mus pahari	10093	PAHARI_EIJ_v1.1	GCA_900095145.2	TRUE	TRUE	TRUE
Steppe mouse	Mus spicilegus	10103	MUSP714	GCA_003336285.1	TRUE	TRUE	TRUE
Algerian mouse	Mus spretus	10096	SPRET_EiJ_v1	GCA_001624865.1	TRUE	TRUE	TRUE
Ferret	Mustela putorius furo	9669	MusPutFur1.0	GCA_000215625.1	TRUE	TRUE	TRUE
Microbat	Myotis lucifugus	59463	Myoluc2.0	GCA_000147115.1	TRUE	TRUE	TRUE
Pinecone soldierfish	Myripristis murdjan	586833	fMyrMur1.1	GCA_902150065.1	FALSE	FALSE	FALSE
Indian cobra	Naja naja	35670	Nana_v5	GCA_009733165.1	FALSE	FALSE	FALSE
Upper Galilee mountains blind mole rat	Nannospalax galili	1026970	S.galili_v1.0	GCA_000622305.1	TRUE	TRUE	TRUE
Round goby	Neogobius melanostomus	47308	RGoby_Basel_V2	GCA_007210695.1	FALSE	FALSE	FALSE
Lyretail cichlid	Neolamprologus brichardi	32507	NeoBri1.0	GCA_000239395.1	FALSE	FALSE	FALSE
American mink	Neovison vison	452646	NNQGG.v01	GCA_900108605.1	TRUE	TRUE	TRUE
Mainland tiger snake	Notechis scutatus	8663	TS10Xv2-PRI	GCA_900518725.1	FALSE	FALSE	FALSE
Turquoise killifish	Nothobranchius furzeri	105023	Nfu_20140520	GCA_001465895.2	FALSE	FALSE	FALSE
Chilean tinamou	Nothoprocta perdicaria	30464	notPer1	GCA_003342845.1	FALSE	FALSE	FALSE
Helmeted guineafowl	Numida meleagris	8996	NumMel1.0	GCA_002078875.2	FALSE	FALSE	FALSE
Degu	Octodon degus	10160	OctDeg1.0	GCA_000260255.1	TRUE	TRUE	TRUE
Coho salmon	Oncorhynchus kisutch	8019	Okis_V2	GCA_002021735.2	FALSE	FALSE	FALSE
Rainbow trout	Oncorhynchus mykiss	8022	Omyk_1.0	GCA_002163495.1	FALSE	FALSE	FALSE
Chinook salmon	Oncorhynchus tshawytscha	74940	Otsh_v1.0	GCA_002872995.1	FALSE	FALSE	FALSE
Blue tilapia	Oreochromis aureus	47969	ASM587006v1	GCA_005870065.1	FALSE	FALSE	FALSE
Nile tilapia	Oreochromis niloticus	8128	O_niloticus_UMD_NMBU	GCA_001858045.3	FALSE	FALSE	FALSE
Platypus	Ornithorhynchus anatinus	9258	mOrnAna1.p.v1	GCA_004115215.2	TRUE	FALSE	FALSE
Rabbit	Oryctolagus cuniculus	9986	OryCun2.0	GCA_000003625.1	TRUE	TRUE	TRUE
Javanese ricefish	Oryzias javanicus	123683	OJAV_1.1	GCA_003999625.1	FALSE	FALSE	FALSE
Japanese medaka HdrR	Oryzias latipes	8090	ASM223467v1	GCA_002234675.1	FALSE	FALSE	FALSE
Indian medaka	Oryzias melastigma	30732	Om_v0.7.RACA	GCA_002922805.1	FALSE	FALSE	FALSE
Chinese medaka	Oryzias sinensis	183150	ASM858656v1	GCA_008586565.1	FALSE	FALSE	FALSE
Bushbaby	Otolemur garnettii	30611	OtoGar3	GCA_000181295.3	TRUE	TRUE	TRUE
Oriental scops-owl	Otus sunia	257818	OtuSun1.0	GCA_010365825.1	FALSE	FALSE	FALSE
Sheep (texel)	Ovis aries	9940	Oar_v3.1	GCA_000298735.1	TRUE	TRUE	TRUE
Bonobo	Pan paniscus	9597	panpan1.1	GCA_000258655.2	TRUE	TRUE	TRUE
Chimpanzee	Pan troglodytes	9598	Pan_tro_3.0	GCA_000001515.5	TRUE	TRUE	TRUE
Lion	Panthera leo	9689	PanLeo1.0	GCA_008795835.1	TRUE	TRUE	TRUE
Leopard	Panthera pardus	9691	PanPar1.0	GCA_001857705.1	TRUE	TRUE	TRUE
Tiger	Panthera tigris altaica	74533	PanTig1.0	GCA_000464555.1	TRUE	TRUE	TRUE
Olive baboon	Papio anubis	9555	Panu_3.0	GCA_000264685.2	TRUE	TRUE	TRUE
Indian glassy fish	Parambassis ranga	210632	fParRan2.1	GCA_900634625.1	FALSE	FALSE	FALSE
P. kingsleyae	Paramormyrops kingsleyae	1676925	PKINGS_0.1	GCA_002872115.1	FALSE	FALSE	FALSE
Great Tit	Parus major	9157	Parus_major1.1	GCA_001522545.2	FALSE	FALSE	FALSE
Indian peafowl	Pavo cristatus	9049	AIIM_Pcri_1.0	GCA_005519975.1	FALSE	FALSE	FALSE
Chinese softshell turtle	Pelodiscus sinensis	13735	PelSin_1.0	GCA_000230535.1	FALSE	FALSE	FALSE
West African mud turtle	Pelusios castaneus	367368	Pelusios_castaneus-1.0	GCA_007922175.1	FALSE	FALSE	FALSE
P. magnuspinnatus	Periophthalmus magnuspinnatus	409849	PM.fa	GCA_000787105.1	FALSE	FALSE	FALSE
Northern American deer mouse	Peromyscus maniculatus bairdii	230844	HU_Pman_2.1	GCA_003704035.1	TRUE	TRUE	TRUE
Lamprey	Petromyzon marinus	7757	Pmarinus_7.0	-	FALSE	FALSE	FALSE
Koala	Phascolarctos cinereus	38626	phaCin_unsw_v4.1	GCA_002099425.1	TRUE	FALSE	FALSE
Ring-necked pheasant	Phasianus colchicus	9054	ASM414374v1	GCA_004143745.1	FALSE	FALSE	FALSE
Vaquita	Phocoena sinus	42100	mPhoSin1.pri	GCA_008692025.1	TRUE	TRUE	TRUE
Sperm whale	Physeter catodon	9755	ASM283717v2	GCA_002837175.2	TRUE	TRUE	TRUE
Ugandan red Colobus	Piliocolobus tephrosceles	591936	ASM277652v2	GCA_002776525.2	TRUE	TRUE	TRUE
Common wall lizard	Podarcis muralis	64176	PodMur_1.0	GCA_004329235.1	FALSE	FALSE	FALSE
Amazon molly	Poecilia formosa	48698	Poecilia_formosa-5.1.2	GCA_000485575.1	FALSE	FALSE	FALSE
Sailfin molly	Poecilia latipinna	48699	P_latipinna-1.0	GCA_001443285.1	FALSE	FALSE	FALSE
Shortfin molly	Poecilia mexicana	48701	P_mexicana-1.0	GCA_001443325.1	FALSE	FALSE	FALSE
Guppy	Poecilia reticulata	8081	Guppy_female_1.0_MT	GCA_000633615.2	FALSE	FALSE	FALSE
Central bearded dragon	Pogona vitticeps	103695	pvi1.1	GCA_900067755.1	FALSE	FALSE	FALSE
Hyrax	Procavia capensis	9813	proCap1	-	TRUE	TRUE	TRUE
Greater bamboo lemur	Prolemur simus	1328070	Prosim_1.0	GCA_003258685.1	TRUE	TRUE	TRUE
Coquerel's sifaka	Propithecus coquereli	379532	Pcoq_1.0	GCA_000956105.1	TRUE	TRUE	TRUE
Eastern brown snake	Pseudonaja textilis	8673	EBS10Xv2-PRI	GCA_900518735.1	FALSE	FALSE	FALSE
Megabat	Pteropus vampyrus	132908	pteVam1	-	TRUE	TRUE	TRUE
Makobe Island cichlid	Pundamilia nyererei	303518	PunNye1.0	GCA_000239375.1	FALSE	FALSE	FALSE
Red-bellied piranha	Pygocentrus nattereri	42514	Pygocentrus_nattereri-1.0.2	GCA_001682695.1	FALSE	FALSE	FALSE
Rat	Rattus norvegicus	10116	Rnor_6.0	GCA_000001895.4	TRUE	TRUE	TRUE
Greater horseshoe bat	Rhinolophus ferrumequinum	59479	mRhiFer1_v1.p	GCA_004115265.2	TRUE	TRUE	TRUE
Black snub-nosed monkey	Rhinopithecus bieti	61621	ASM169854v1	GCA_001698545.1	TRUE	TRUE	TRUE
Golden snub-nosed monkey	Rhinopithecus roxellana	61622	Rrox_v1	GCA_000769185.1	TRUE	TRUE	TRUE
Jewelled blenny	Salarias fasciatus	181472	fSalaFa1.1	GCA_902148845.1	FALSE	FALSE	FALSE
Atlantic salmon	Salmo salar	8030	ICSASG_v2	GCA_000233375.4	FALSE	FALSE	FALSE
Brown trout	Salmo trutta	8032	fSalTru1.1	GCA_901001165.1	FALSE	FALSE	FALSE
Pike-perch	Sander lucioperca	283035	SLUC_FBN_1	GCA_008315115.1	FALSE	FALSE	FALSE
Tasmanian devil	Sarcophilus harrisii	9305	mSarHar1.11	GCA_902635505.1	TRUE	FALSE	TRUE
Eurasian red squirrel	Sciurus vulgaris	55149	mSciVul1.1	GCA_902686455.1	TRUE	TRUE	TRUE
Asian bonytongue	Scleropages formosus	113540	fSclFor1.1	GCA_900964775.1	FALSE	FALSE	FALSE
Turbot	Scophthalmus maximus	52904	ASM318616v1	GCA_003186165.1	FALSE	FALSE	FALSE
Common canary	Serinus canaria	9135	SCA1	GCA_000534875.1	FALSE	FALSE	FALSE
Greater amberjack	Seriola dumerili	41447	Sdu_1.0	GCA_002260705.1	FALSE	FALSE	FALSE
Yellowtail amberjack	Seriola lalandi dorsalis	1841481	Sedor1	GCA_002814215.1	FALSE	FALSE	FALSE
Blind barbel	Sinocyclocheilus anshuiensis	1608454	SAMN03320099.WGS_v1.1	GCA_001515605.1	FALSE	FALSE	FALSE
Golden-line barbel	Sinocyclocheilus grahami	75366	SAMN03320097.WGS_v1.1	GCA_001515645.1	FALSE	FALSE	FALSE
Horned golden-line barbel	Sinocyclocheilus rhinocerous	307959	SAMN03320098_v1.1	GCA_001515625.1	FALSE	FALSE	FALSE
Gilthead seabream	Sparus aurata	8175	fSpaAur1.1	GCA_900880675.1	FALSE	FALSE	FALSE
Daurian ground squirrel	Spermophilus dauricus	99837	ASM240643v1	GCA_002406435.1	TRUE	TRUE	TRUE
Orbiculate cardinalfish	Sphaeramia orbicularis	375764	fSphaOr1.1	GCA_902148855.1	FALSE	FALSE	FALSE
Tuatara	Sphenodon punctatus	8508	ASM311381v1	GCA_003113815.1	FALSE	FALSE	FALSE
Bicolor damselfish	Stegastes partitus	144197	Stegastes_partitus-1.0.2	GCA_000690725.1	FALSE	FALSE	FALSE
Kakapo	Strigops habroptila	2489341	bStrHab1_v1.p	GCA_004027225.1	FALSE	FALSE	FALSE
Northern spotted owl	Strix occidentalis caurina	311401	Soccid_v01	GCA_002372975.1	FALSE	FALSE	FALSE
African ostrich	Struthio camelus australis	441894	ASM69896v1	GCA_000698965.1	FALSE	FALSE	FALSE
Pig	Sus scrofa	9823	Sscrofa11.1	GCA_000003025.6	TRUE	TRUE	TRUE
Zebra finch	Taeniopygia guttata	59729	bTaeGut1_v1.p	GCA_003957565.2	FALSE	FALSE	FALSE
Fugu	Takifugu rubripes	31033	fTakRub1.2	GCA_901000725.2	FALSE	FALSE	FALSE
Three-toed box turtle	Terrapene carolina triunguis	2587831	T_m_triunguis-2.0	GCA_002925995.2	FALSE	FALSE	FALSE
Tetraodon	Tetraodon nigroviridis	99883	TETRAODON 8.0	-	FALSE	FALSE	FALSE
Gelada	Theropithecus gelada	9565	Tgel_1.0	GCA_003255815.1	TRUE	TRUE	TRUE
Tree Shrew	Tupaia belangeri	37347	tupBel1	-	TRUE	TRUE	TRUE
Arctic ground squirrel	Urocitellus parryii	9999	ASM342692v1	GCA_003426925.1	TRUE	TRUE	TRUE
American black bear	Ursus americanus	9643	ASM334442v1	GCA_003344425.1	TRUE	TRUE	TRUE
Polar bear	Ursus maritimus	29073	UrsMar_1.0	GCA_000687225.1	TRUE	TRUE	TRUE
Komodo dragon	Varanus komodoensis	61221	ASM479886v1	GCA_004798865.1	FALSE	FALSE	FALSE
Common wombat	Vombatus ursinus	29139	bare-nosed_wombat_genome_assembly	GCA_900497805.2	TRUE	FALSE	TRUE
Red fox	Vulpes vulpes	9627	VulVul2.2	GCA_003160815.1	TRUE	TRUE	TRUE
Tropical clawed frog	Xenopus tropicalis	8364	Xenopus_tropicalis_v9.1	GCA_000004195.3	FALSE	FALSE	FALSE
Monterrey platyfish	Xiphophorus couchianus	32473	Xiphophorus_couchianus-4.0.1	GCA_001444195.1	FALSE	FALSE	FALSE
Platyfish	Xiphophorus maculatus	8083	X_maculatus-5.0-male	GCA_002775205.2	FALSE	FALSE	FALSE
White-throated sparrow	Zonotrichia albicollis	44394	Zonotrichia_albicollis-1.0.1	GCA_000385455.1	FALSE	FALSE	FALSE
Silver-eye	Zosterops lateralis melanops	1220523	ASM128173v1	GCA_001281735.1	FALSE	FALSE	FALSE

## Sheet: Table S2
Table S2: SPAAR in marsupial and monotreme genome assemblies
Common name	Scientific name	Taxonomy ID	Assembly Name	Genome Accession Number	NCBI Reference Sequence	ORF Length (a.a.)	Location	Protein Sequence	Nucleotide Sequence
Gray short-tailed opossum	Monodelphis domestica	13616	MonDom5	GCF_000002295.2	NC_008806.1	55	chr6: 134827716-134827883	MEIMVMGVILTLFAIILVTFCILCWSSYNKAPWNQHEDITPTFTLSTFHREDLLL	ATGGAAATCATGGTAATGGGGGTGATCCTGACTTTATTTGCTATAATACTGGTGACTTTCTGTATCCTCTGCTGGTCCAGCTACAACAAAGCACCATGGAATCAGCATGAAGACATTACCCCAACGTTTACTTTGTCCACTTTCCATAGGGAAGATCTTTTATTGTAA
Tasmanian devil	Sarcophilus harrisii	9305	mSarHar1.11	GCF_902635505.1	NC_045426.1	78	chr1:331403537-331403773	METMVMGMILTLFAIILVTFCILCWSSYNKTPWNQHQESIPNFTLATFHREASLIVRPTGQHSNSHSSTNQRNFFSFM	ATGGAAACCATGGTAATGGGGATGATTCTGACTTTATTTGCTATTATATTAGTTACCTTTTGTATTCTCTGCTGGTCTAGCTATAACAAAACCCCATGGAATCAACACCAAGAGAGTATCCCAAACTTTACTTTGGCCACTTTCCACAGGGAAGCTTCTCTTATTGTAAGACCTACTGGTCAGCATTCTAATTCCCACTCATCAACCAACCAAAGGAATTTCTTTTCCTTTATGTGA
Koala	Phascolarctos cinereus	38626	phaCin_unsw_v4.1	GCF_002099425.1	NW_018344011.1	77	phaCin_unsw_v4.1.fa.scaf00060:8026903-8027136 (+)	METMVVGVILTLFAIILVTFCILCCSSYNKSPWNQPQDRIPNFTLATFHKEASFVRPTGQHSNSHSSPNQRNLFSFM	ATGGAAACCATGGTGGTGGGGGTGATCCTGACTTTATTTGCTATTATATTGGTGACTTTTTGTATCCTATGCTGCTCCAGCTACAACAAATCCCCCTGGAATCAGCCCCAAGACAGGATCCCAAATTTTACTTTGGCCACTTTCCACAAGGAAGCTTCATTTGTAAGACCTACTGGTCAGCATTCTAATTCCCATTCGTCCCCCAACCAAAGGAATTTATTCTCCTTTATGTGA
Common wombat	Vombatus ursinus	29139	bare-nosed wombat genome assembly	GCF_900497805.2	UNPS02014171.1	77	WM1_genome_scaffold14171:83134-83367	METMVVGVILTLFAIILVTFCILCWSSYNKSPWNQHQDSIPNFTLVTFHREASFVRPTGQHANAHSSPNQRNLFSFM	ATGGAAACCATGGTGGTGGGGGTGATCCTGACTTTATTTGCTATTATATTGGTGACTTTTTGTATCCTCTGCTGGTCCAGCTACAACAAATCCCCCTGGAATCAGCACCAAGATAGTATCCCAAACTTTACTTTGGTCACTTTCCACAGGGAAGCTTCATTTGTAAGACCTACTGGTCAGCATGCTAATGCCCATTCATCCCCCAACCAAAGGAATTTATTTTCCTTTATGTGA
Platypus	Ornithorhynchus anatinus	9258	mOrnAna1.pri.v4	GCF_004115215.2	NC_041753.1	78	chrX5:22421144-22421380 (+)	MDVLIIGLIFSFFVIIVITVCVLCCLSFRKTPGNEHQIRVPSFTVATFKQEDSLFSTPRDLNKKQLSSSHRGNFCSLI	ATGGATGTGCTGATTATTGGGCTAATTTTCAGTTTCTTTGTCATTATAGTGATCACAGTCTGTGTGCTCTGTTGCTTAAGCTTCAGGAAAACCCCAGGAAATGAACATCAAATCAGAGTCCCAAGTTTTACGGTGGCCACTTTTAAACAGGAGGATTCACTTTTTTCCACTCCTAGAGATCTTAATAAGAAGCAACTCTCATCATCGCACCGTGGGAACTTTTGTTCATTGATCTGA
Echidna	Tachyglossus aculeatus	9261	mTacAcu1.pri	GCF_015852505.1	NC_052098.1	78	chrX4:50061490-50061726 (-)	MDVLIIGLIFSFFVIIVITVCVLCCLSFRKTPGNEHQIRVPSFTVATFKQEDSLFSTPRDQHANAHSSPNQRNLFSFM	ATGGATGCACTGATAATTGGGCTAATTTTCAGTTTCTTTGTCATTATAGTGATCACAGTCTGTGTACTCTGTTGCTTAAGCTTCAGGAAAACCCCAGAAAATGAACATCAAATCAGAGTCCCAAGTTTTACTGTGGCCACTTTTAAGCAGGAGGATTCACTTTTTTGTACTCCTAGAGATCTTAATAAGAAGCAATTCTCATCATCACACCACGGGAACTTGCATTCATTGATCTGA

## Sheet: Table S3
Table S3: Non-mammalian genomes used to search for SPAAR
Common name	Scientific name	Assembly name	Accession
Chicken	Gallus gallus	bGalGal1.mat.broiler.GRCg7b	GCA_016699485.1
African clawed frog	Xenopus_laevis	Xenopus_laevis_v10.1	GCA_017654675.1
Green anole	Anolis carolinensis	AnoCar2.0	GCA_000090745.2
Zebrafish	Danio rerio	GRCz11	GCA_000002035.4

## Sheet: Table S4
Table S4: Additional primate genomes used for assessment of long SPAAR ORF
Common name	Scientific name	Assembly name	Accession	SPAAR length (a.a.)	SPAAR sequence
Gibbon	Nomascus leucogenys	Asia_NLE_v1	GCA_006542625.1	90	MGAKALRGPKVAQWAMETAVIGVVVVLFVVTVATTCILCCFSCDSRAQDPQGGPGRSFTVATFRQEASLFTGPGRHAQPVPSARDFWTFM
Bolivian squirrel monkey	Saimiri boliviensis boliviensis	BCM_Sbol_2.0	GCA_016699345.1	90	MGVKASRGPKVAQRAMETAVIGVVAVLFVVTVTITCVLCCFSCDSTAQDLQGGPGSSFTVATFHREASLFTGPGRHAQPVPSARDFWTFM
Orangutan	Pongo abelii	Susie_PABv2	GCA_002880775.3	90	MGAKAPRGPKVAQWAMETAVIGVVVVLFVVTVAITCVLCCFSCDSRAQDPQGGPGRSFTVATFRQEASLFTGPVRHAQLVPSAQDFWTFM

## Sheet: Table S5
Table S5: Annotations of SPAAR in NCBI Gene (28-Aug-2021)
Gene ID	Gene symbol	Description	Scientific name	Common name	RefSeq Transcript accessions	RefSeq Protein accessions	Curation Status
113593672	SPAAR	small regulatory polypeptide of amino acid response	Acinonyx jubatus	cheetah	XM_027039431.1	XP_026895232.1	model
117802990	SPAAR	small regulatory polypeptide of amino acid response	Ailuropoda melanoleuca	giant panda	XM_034664106.1	XP_034519997.1	model
119048751	SPAAR	small regulatory polypeptide of amino acid response	Artibeus jamaicensis	Jamaican fruit-eating bat	XM_037144508.1	XP_037000403.1	model
117709392	Spaar	small regulatory polypeptide of amino acid response	Arvicanthis niloticus	African grass rat	XM_034503744.1	XP_034359635.1	model
119826767	Spaar	small regulatory polypeptide of amino acid response	Arvicola amphibius	Eurasian water vole	XM_038348254.1	XP_038204182.1	model
114235861	SPAAR	small regulatory polypeptide of amino acid response	Balaenoptera acutorostrata scammoni		XM_028162561.1	XP_028018362.1	model
118896993	SPAAR	small regulatory polypeptide of amino acid response	Balaenoptera musculus	Blue whale	XM_036855687.1	XP_036711582.1	model
113897188	SPAAR	small regulatory polypeptide of amino acid response	Bos indicus x Bos taurus	hybrid cattle	XM_027549648.1	XP_027405449.1	model
112441516	SPAAR	small regulatory polypeptide of amino acid response	Bos taurus	cattle	XM_024996206.1	XP_024851974.1	model
112583915	SPAAR	small regulatory polypeptide of amino acid response	Bubalus bubalis	water buffalo	XM_025281711.1	XP_025137496.1	model
118142974	SPAAR	small regulatory polypeptide of amino acid response	Callithrix jacchus	white-tufted-ear marmoset	XM_035251834.1	XP_035107725.1	model
112809519	SPAAR	small regulatory polypeptide of amino acid response	Callorhinus ursinus	northern fur seal	XM_025852813.1	XP_025708598.1	model
116152681	SPAAR	small regulatory polypeptide of amino acid response	Camelus dromedarius	Arabian camel	XM_031450019.1	XP_031305879.1	model
116663187	SPAAR	small regulatory polypeptide of amino acid response	Camelus ferus	Wild Bactrian camel	XM_032477975.1	XP_032333866.1	model
112650157	SPAAR	small regulatory polypeptide of amino acid response	Canis lupus dingo	dingo	XM_035697194.1	XP_035553087.1	model
106559493	SPAAR	small regulatory polypeptide of amino acid response	Canis lupus familiaris	dog	XM_022425596.2	XP_022281304.1	model
108314264	SPAAR	small regulatory polypeptide of amino acid response	Cebus imitator	Panamanian white-faced capuchin	XM_037743626.1	XP_037599554.1	model
119624334	SPAAR	small regulatory polypeptide of amino acid response	Chlorocebus sabaeus	green monkey	XM_037998263.1	XP_037854191.1	model
119505363	SPAAR	small regulatory polypeptide of amino acid response	Choloepus didactylus	southern two-toed sloth	XM_037798082.1	XP_037654010.1	model
113830939	Spaar	small regulatory polypeptide of amino acid response	Cricetulus griseus	Chinese hamster	XM_027384358.2	XP_027240159.1	model
115803828	SPAAR	small regulatory polypeptide of amino acid response	Delphinapterus leucas	beluga whale	XM_030763768.1	XP_030619628.1	model
112304505	SPAAR	small regulatory polypeptide of amino acid response	Desmodus rotundus	common vampire bat	XM_024560130.1	XP_024415898.1	model
122122379	Spaar	small regulatory polypeptide of amino acid response	Dipodomys spectabilis	banner-tailed kangaroo rat	XM_042696554.1	XP_042552488.1	model
115869383	SPAAR	small regulatory polypeptide of amino acid response	Echinops telfairi	small Madagascar hedgehog	XM_030885315.1	XP_030741175.1	model
114231691	SPAAR	small regulatory polypeptide of amino acid response	Eptesicus fuscus	big brown bat	XM_028146068.1	XP_028001869.1	model
114202837	SPAAR	small regulatory polypeptide of amino acid response	Eumetopias jubatus	Steller sea lion	XM_028096227.1	XP_027952028.1	model
117284331	Spaar	small regulatory polypeptide of amino acid response	Fukomys damarensis	Damara mole-rat	XM_033759093.1	XP_033614984.1	model
115867776	SPAAR	small regulatory polypeptide of amino acid response	Globicephala melas	long-finned pilot whale	XM_030884141.1	XP_030740001.1	model
115935824	SPAAR	small regulatory polypeptide of amino acid response	Gorilla gorilla	western gorilla	XM_031014707.1	XP_030870567.1	model
114635659	Spaar	small regulatory polypeptide of amino acid response	Grammomys surdaster		XM_028784154.1	XP_028639987.1	model
118528725	SPAAR	small regulatory polypeptide of amino acid response	Halichoerus grypus	gray seal	XM_036081296.1	XP_035937189.1	model
158376	SPAAR	small regulatory polypeptide of amino acid response	Homo sapiens	human	NM_001348107.3	NP_001335036.2	curated
120221282	SPAAR	small regulatory polypeptide of amino acid response	Hyaena hyaena	striped hyena	XM_039218576.1	XP_039074507.1	model
116474169	SPAAR	small regulatory polypeptide of amino acid response	Hylobates moloch	silvery gibbon	XM_032162637.1	XP_032018528.1	model
120889839	Spaar	small regulatory polypeptide of amino acid response	Ictidomys tridecemlineatus	thirteen-lined ground squirrel	XM_040286038.1	XP_040141972.1	model
113620235	SPAAR	small regulatory polypeptide of amino acid response	Lagenorhynchus obliquidens	Pacific white-sided dolphin	XM_027105991.1	XP_026961792.1	model
115938452	SPAAR	small regulatory polypeptide of amino acid response	Leptonychotes weddellii	Weddell seal	XM_031022185.1	XP_030878045.1	model
116869392	SPAAR	small regulatory polypeptide of amino acid response	Lontra canadensis	Northern American river otter	XM_032860568.1	XP_032716459.1	model
115499922	SPAAR	small regulatory polypeptide of amino acid response	Lynx canadensis	Canada lynx	XM_030294181.1	XP_030150041.1	model
106993702	SPAAR	small regulatory polypeptide of amino acid response	Macaca mulatta	Rhesus monkey	XM_028835062.1	XP_028690895.1	model
112427406	SPAAR	small regulatory polypeptide of amino acid response	Macaca nemestrina	pig-tailed macaque	XM_024794050.1	XP_024649818.1	model
118968040	SPAAR	small regulatory polypeptide of amino acid response	Manis javanica	Malayan pangolin	XM_036996603.1	XP_036852498.1	model
118914054	SPAAR	small regulatory polypeptide of amino acid response	Manis pentadactyla	Chinese pangolin	XM_036888535.1	XP_036744430.1	model
114089239	Spaar	small regulatory polypeptide of amino acid response	Marmota flaviventris	yellow-bellied marmot	XM_027931034.2	XP_027786835.1	model
116095289	Spaar	small regulatory polypeptide of amino acid response	Mastomys coucha	southern multimammate mouse	XM_031376756.1	XP_031232616.1	model
106021836	Spaar	small regulatory polypeptide of amino acid response	Mesocricetus auratus	golden hamster	XM_021232290.2	XP_021087949.1	model
113457739	Spaar	small regulatory polypeptide of amino acid response	Microtus ochrogaster	prairie vole	XM_026786605.1	XP_026642406.1	model
121458524	Spaar	small regulatory polypeptide of amino acid response	Microtus oregoni	creeping vole	XM_041667850.1	XP_041523784.1	model
118017957	SPAAR	small regulatory polypeptide of amino acid response	Mirounga leonina	Southern elephant seal	XM_035016320.1	XP_034872211.1	model
118630157	SPAAR	small regulatory polypeptide of amino acid response	Molossus molossus	Pallas's mastiff bat	XM_036261886.1	XP_036117779.1	model
114884683	SPAAR	small regulatory polypeptide of amino acid response	Monodon monoceros	narwhal	XM_029203802.1	XP_029059635.1	model
110293775	Spaar	small regulatory polypeptide of amino acid response	Mus caroli	Ryukyu mouse	XM_021161641.2	XP_021017300.1	model
71406	Spaar	small regulatory polypeptide of amino acid response	Mus musculus	house mouse	NM_001348108.1	NP_001335037.1	curated
110338608	Spaar	small regulatory polypeptide of amino acid response	Mus pahari	shrew mouse	XM_029533418.1	XP_029389278.1	model
116570384	SPAAR	small regulatory polypeptide of amino acid response	Mustela erminea	ermine	XM_032307425.1	XP_032163316.1	model
118667326	SPAAR	small regulatory polypeptide of amino acid response	Myotis myotis		XM_036330398.1	XP_036186291.1	model
115071922	Spaar	small regulatory polypeptide of amino acid response	Nannospalax galili	Upper Galilee mountains blind mole rat	XM_029567972.1	XP_029423832.1	model
112411746	SPAAR	small regulatory polypeptide of amino acid response	Neophocaena asiaeorientalis asiaeorientalis	Yangtze finless porpoise	XM_024763036.1	XP_024618804.1	model
115836284	SPAAR	small regulatory polypeptide of amino acid response	Nomascus leucogenys	northern white-cheeked gibbon	XM_030816459.1	XP_030672319.1	model
121145016	SPAAR	small regulatory polypeptide of amino acid response	Ochotona curzoniae	black-lipped pika	XM_040963655.1	XP_040819589.1	model
118759905	SPAAR	small regulatory polypeptide of amino acid response	Ochotona princeps	American pika	XM_036496655.1	XP_036352548.1	model
118578348	Spaar	small regulatory polypeptide of amino acid response	Onychomys torridus	southern grasshopper mouse	XM_036179226.1	XP_036035119.1	model
117201869	SPAAR	small regulatory polypeptide of amino acid response	Orcinus orca	killer whale	XM_033431101.1	XP_033286992.1	model
120881928	SPAAR	small regulatory polypeptide of amino acid response	Oryx dammah	scimitar-horned oryx	XM_040265671.1	XP_040121605.1	model
121815990	SPAAR	small regulatory polypeptide of amino acid response	Ovis aries	sheep	XM_042243262.1	XP_042099196.1	model
103783513	SPAAR	small regulatory polypeptide of amino acid response	Pan paniscus	pygmy chimpanzee	XM_034967413.1	XP_034823304.1	model
110741393	SPAAR	small regulatory polypeptide of amino acid response	Papio anubis	olive baboon	XM_031654314.1	XP_031510174.1	model
114703196	Spaar	small regulatory polypeptide of amino acid response	Peromyscus leucopus	white-footed mouse	XM_028883933.2	XP_028739766.1	model
107402351	Spaar	small regulatory polypeptide of amino acid response	Peromyscus maniculatus bairdii	prairie deer mouse	XR_001579462.1		model
116627152	SPAAR	small regulatory polypeptide of amino acid response	Phoca vitulina	harbor seal	XM_032396841.1	XP_032252732.1	model
116755879	SPAAR	small regulatory polypeptide of amino acid response	Phocoena sinus	vaquita	XM_032635899.1	XP_032491790.1	model
114512810	SPAAR	small regulatory polypeptide of amino acid response	Phyllostomus discolor	pale spear-nosed bat	XM_036021916.1	XP_035877809.1	model
112065479	SPAAR	small regulatory polypeptide of amino acid response	Physeter catodon	sperm whale	XM_028494308.1	XP_028350109.1	model
111535086	SPAAR	small regulatory polypeptide of amino acid response	Piliocolobus tephrosceles	Ugandan red Colobus	XM_023201522.2	XP_023057290.1	model
118716339	SPAAR	small regulatory polypeptide of amino acid response	Pipistrellus kuhlii	Kuhl's pipistrelle	XM_036433416.1	XP_036289309.1	model
112479452	SPAAR	small regulatory polypeptide of amino acid response	Pteropus alecto	black flying fox	XM_025046569.1	XP_024902337.1	model
120598145	SPAAR	small regulatory polypeptide of amino acid response	Pteropus giganteus	Indian flying fox	XM_039856934.1	XP_039712868.1	model
112851396	SPAAR	small regulatory polypeptide of amino acid response	Puma concolor	puma	XM_025914936.1	XP_025770721.1	model
121034662	SPAAR	small regulatory polypeptide of amino acid response	Puma yagouaroundi	jaguarundi	XM_040481668.1	XP_040337602.1	model
120102861	Spaar	small regulatory polypeptide of amino acid response	Rattus norvegicus	Norway rat	XM_039111018.1	XP_038966946.1	model
116885834	Spaar	small regulatory polypeptide of amino acid response	Rattus rattus	black rat	XM_032887177.1	XP_032743068.1	model
117032420	SPAAR	small regulatory polypeptide of amino acid response	Rhinolophus ferrumequinum	greater horseshoe bat	XM_033123948.1	XP_032979839.1	model
115893961	SPAAR	small regulatory polypeptide of amino acid response	Rhinopithecus roxellana	golden snub-nosed monkey	XM_030919920.1	XP_030775780.1	model
118600347	SPAAR	small regulatory polypeptide of amino acid response	Rousettus aegyptiacus	Egyptian rousette	XM_036217569.1	XP_036073462.1	model
120366369	SPAAR	small regulatory polypeptide of amino acid response	Saimiri boliviensis	Bolivian squirrel monkey	XM_039475022.1	XP_039330956.1	model
116524674	SPAAR	small regulatory polypeptide of amino acid response	Sapajus apella	tufted capuchin	XM_032240044.1	XP_032095935.1	model
118979775	SPAAR	small regulatory polypeptide of amino acid response	Sturnira hondurensis		XM_037036002.1	XP_036891897.1	model
115276374	SPAAR	small regulatory polypeptide of amino acid response	Suricata suricatta	meerkat	XM_029920388.1	XP_029776248.1	model
119231969	SPAAR	small regulatory polypeptide of amino acid response	Talpa occidentalis	Iberian mole	XM_037493815.1	XP_037349712.1	model
117098993	SPAAR	small regulatory polypeptide of amino acid response	Trachypithecus francoisi	Francois's langur	XM_033238121.1	XP_033094012.1	model
114006842	SPAAR	small regulatory polypeptide of amino acid response	Tupaia chinensis	Chinese tree shrew	XM_027769851.1	XP_027625652.1	model
117312782	SPAAR	small regulatory polypeptide of amino acid response	Tursiops truncatus	common bottlenose dolphin	XM_033859270.1	XP_033715161.1	model
113201594	Spaar	small regulatory polypeptide of amino acid response	Urocitellus parryii	Arctic ground squirrel	XM_026415395.1	XP_026271180.1	model
113260458	SPAAR	small regulatory polypeptide of amino acid response	Ursus arctos horribilis		XM_026506243.1	XP_026362028.1	model
103667097	SPAAR	small regulatory polypeptide of amino acid response	Ursus maritimus	polar bear	XM_040631591.1	XP_040487525.1	model
116280315	SPAAR	small regulatory polypeptide of amino acid response	Vicugna pacos	alpaca	XM_031677293.1	XP_031533153.1	model
121496057	SPAAR	small regulatory polypeptide of amino acid response	Vulpes lagopus	Arctic fox	XM_041764267.1	XP_041620201.1	model
112930870	SPAAR	small regulatory polypeptide of amino acid response	Vulpes vulpes	red fox	XM_026013318.1	XP_025869103.1	model
113935051	SPAAR	small regulatory polypeptide of amino acid response	Zalophus californianus	California sea lion	XM_027616782.2	XP_027472583.2	model

## Sheet: Table S6
Table S6: Annotations of human SPAAR orthologs in Ensembl release 104
Species	Orthologue	Target %id	Query %id	GOC Score	WGA Coverage	High Confidence
Giant panda (Ailuropoda melanoleuca)	SPAAR (ENSAMEG00000023597)	0.8205	0.8533	100	n/a	Yes
Blue whale (Balaenoptera musculus)	SPAAR (ENSBMSG00010005307)	0.8	0.8	100	100	Yes
American bison (Bison bison bison)	SPAAR (ENSBBBG00000017054)	0.84	0.84	100	100	Yes
Cow (Bos taurus)	SPAAR (ENSBTAG00000050436)	0.84	0.84	100	100	Yes
Marmoset (Callithrix jacchus)	SPAAR (ENSCJAG00000045403)	0.9067	0.9067	100	100	Yes
Arabian camel (Camelus dromedarius)	SPAAR (ENSCDRG00005004412)	0.88	0.88	100	100	Yes
Dog (Canis lupus familiaris)	SPAAR (ENSCAFG00000045785)	0.8667	0.8667	100	100	Yes
Goat (Capra hircus)	SPAAR (ENSCHIG00000023998)	0.7386	0.8667	100	100	Yes
Chacoan peccary (Catagonus wagneri)	SPAAR (ENSCWAG00000003846)	0.8667	0.8667	75	100	Yes
Sooty mangabey (Cercocebus atys)	SPAAR (ENSCATG00000024206)	0.8111	0.9733	75	100	Yes
Chinese hamster CHOK1GS (Cricetulus griseus)	Spaar (ENSCGRG00001003061)	0.68	0.68	100	100	Yes
Armadillo (Dasypus novemcinctus)	SPAAR (ENSDNOG00000044089)	0.8	0.7467	100	100	Yes
Donkey (Equus asinus asinus)	SPAAR (ENSEASG00005000146)	0.8133	0.8133	100	100	Yes
Horse (Equus caballus)	SPAAR (ENSECAG00000032005)	0.8133	0.8133	100	100	Yes
Gorilla (Gorilla gorilla gorilla)	SPAAR (ENSGGOG00000039944)	0.8333	1	100	100	Yes
Macaque (Macaca mulatta)	SPAAR (ENSMMUG00000051938)	0.8111	0.9733	100	100	Yes
Pig-tailed macaque (Macaca nemestrina)	SPAAR (ENSMNEG00000028379)	0.8111	0.9733	100	100	Yes
Drill (Mandrillus leucophaeus)	SPAAR (ENSMLEG00000022341)	0.8111	0.9733	25	100	Yes
Mouse (Mus musculus)	Spaar (ENSMUSG00000028475)	0.6533	0.6533	100	0	Yes
Steppe mouse (Mus spicilegus)	Spaar (ENSMSIG00000019477)	0.6667	0.6667	75	100	Yes
American mink (Neovison vison)	SPAAR (ENSNVIG00000017044)	0.8571	0.88	75	100	Yes
Bonobo (Pan paniscus)	SPAAR (ENSPPAG00000023559)	0.8111	0.9733	100	100	Yes
Chimpanzee (Pan troglodytes)	SPAAR (ENSPTRG00000043422)	0.8111	0.9733	100	100	Yes
Lion (Panthera leo)	SPAAR (ENSPLOG00000013091)	0.8533	0.8533	100	100	Yes
Leopard (Panthera pardus)	SPAAR (ENSPPRG00000018784)	0.8533	0.8533	100	100	Yes
Tiger (Panthera tigris altaica)	SPAAR (ENSPTIG00000003564)	0.8533	0.8533	100	100	Yes
Olive baboon (Papio anubis)	SPAAR (ENSPANG00000031004)	0.96	0.96	100	100	Yes
Northern American deer mouse (Peromyscus maniculatus bairdii)	Spaar (ENSPEMG00000030980)	0.6533	0.6533	100	100	Yes
Vaquita (Phocoena sinus)	SPAAR (ENSPSNG00000014832)	0.76	0.76	75	100	Yes
Sperm whale (Physeter catodon)	SPAAR (ENSPCTG00005019176)	0.7867	0.7867	100	100	Yes
Greater bamboo lemur (Prolemur simus)	SPAAR (ENSPSMG00000003901)	0.7556	0.9067	100	98.97	Yes
Black snub-nosed monkey (Rhinopithecus bieti)	SPAAR (ENSRBIG00000009618)	0.9733	0.9733	75	100	Yes
Golden snub-nosed monkey (Rhinopithecus roxellana)	SPAAR (ENSRROG00000024127)	0.96	0.96	50	100	Yes
Eurasian red squirrel (Sciurus vulgaris)	SPAAR (ENSSVLG00005024697)	0.8082	0.7867	100	100	Yes
Arctic ground squirrel (Urocitellus parryii)	SPAAR (ENSUPAG00010017615)	0.7808	0.76	100	100	Yes

## Sheet: Table S7
Table S7: ORF sequences found through LastZ syntenic alignments
Common name	Scientific name	Amino acid length	ORF sequence
Ma's night monkey	Aotus nancymaae	75	ATGGAAACGGCAGTGATTGGGGTAGTGGCGGTACTGTTTGTGGTGACTGTGACCATTACCTGTGTCCTCTGCTGCTTCAGCTGCGACTCGAGGGCCCAGGATCTACAGGGGGGCCCTGGGAGCAGCTTCACGGTGGCCACGTTTCGCCAGGAGGCTTCTCTCTTCACGGGGCCTGGTCGCCATGCCCAGGCAGTGCCTAGTGCCCGGGACTTCTGGACCTTCATGTGA
Blue whale	Balaenoptera musculus	75	ATGGAAACGGCAGTGATTGGAATGGTGGCCGTACTATTCGTGGTCACCGTGGCCATCACCTGCATCCTTTGCTGTTTCAGCTGTGACTCAAGGACCCAGGATTCTCAGGGGAGCCCACGCCCTAGCTTCACGGTGGCCACGTTTCGCCAGGAGGCTTCTCTCTCCACGGGGCCAGGTCATCATGCCCAGCCAGTGGCGGGTGTCCGGGACTTCTGGACCTTCATGTGA
American bison	Bison bison bison	75	ATGGAAACAGCAGTGATTGGAGTGGTGGCTGTGCTATTCGTGGTCACCGTGGCCATCACCTGTGTCCTCTGCTGCTTCAGCTGTGACTCAAGGAGCCAGGATCCTCAGGGGGCCCCGAGCCCCAGCTTCACAGTAGCCACGTTTCGCAAGGAGGCTTCTCTCTTCACTGGGCCAGATCACAATGCTCAGCCAGTGGCAGGTGCCTGGGACTTCTGGACCTTCATGTGA
Domestic yak	Bos grunniens	75	ATGGAAACAGCAGTGATTGGAGTGGTGGCTGTGCTATTCGTGGTCACCGTGGCCATCACCTGTGTCCTCTGCTGCTTCAGCTGTGACTCAAGGAGCCAGGATCCTCAGGGGGCCCCGAGCCCCAGCTTCACAGTAGCCACGTTTCGCAAGGAGGCTTCTCTCTTCACTGGGCCAGATCACAATGCTCAGCCAGTGGCAGGTGCCTGGGACTTCTGGACCTTCATGTGA
Hybrid - Bos Indicus	Bos indicus x Bos taurus	75	ATGGAAACAGCAGTGATTGGAGTGGTGGCTGTGCTATTCGTGGTCACCGTGGCCATCACCTGTGTCCTCTGCTGCTTCAGCTGTGACTCAAGGAGCCAGGATCCTCAGGGGGCCCCGAGCCCCAGCTTCACAGTAGCCACGTTTCGCAAGGAGGCTTCTCTCTTCACTGGGCCAGATCACAATGCTCAGCCAGTGGCAGGTGCCTGGGACTTCTGGACCTTCATGTGA
Wild yak	Bos mutus	75	ATGGAAACAGCAGTGATTGGAGTGGTGGCTGTGCTATTCGTGGTCACCGTGGCCATCACCTGTGTCCTCTGCTGCTTCAGCTGTGACTCAAGGAGCCAGGATCCTCAGGGGGCCCCGAGCCCCAGCTTCACAGTAGCCACGTTTCGCAAGGAGGCTTCTCTCTTCACTGGGCCAGATCACAATGCTCAGCCAGTGGCAGGTGCCTGGGACTTCTGGACCTTCATGTGA
Cow	Bos taurus	75	ATGGAAACAGCAGTGATTGGAGTGGTGGCTGTGCTATTCGTGGTCACCGTGGCCATCACCTGTGTCCTCTGCTGCTTCAGCTGTGACTCAAGGAGCCAGGATCCTCAGGGGGCCCCGAGCCCCAGCTTCACAGTAGCCACGTTTCGCAAGGAGGCTTCTCTCTTCACTGGGCCAGATCACAATGCTCAGCCAGTGGCAGGTGCCTGGGACTTCTGGACCTTCATGTGA
Marmoset	Callithrix jacchus	75	ATGGAAACGGCAGTGATTGGGGTAGTGGCGGTACTGTTTGTGGTGACTGTGACCATCACCTGTGTCCTCTGCTGCTTCAGCTGTGACTCGAGGGCCCAGGATCTACAGGAGGGCTCTGGGAGCAGCTTCACGGTGGCCACATTTCGCCAAGAGGCTTCTCTTTTCACGGGGCCTGGTCGCCATGCCCAGCCAGTGCCTAGTGCCCAGGACTTCTGGACCTTCATGTGA
Arabian camel	Camelus dromedarius	75	ATGGAATCCGCAGTGATCGGAGTGGTGGCCGTGCTATTCGTGGTCACCGTGGCCATCACCTGCGTCCTTTGTTGCTTCAGCTGTGACTCGAGGGCCCAGGATCTTCAGGGGGGCCCGTGCCGCAGCTTTACAGTGGCCACGTTTCGCCAGGAGGCTTCTCTCTTCACGGGGCCAAGTTGCCACGCCCAGCCAGTGGCAGGTGCCCGGGACTTCTGGACCTTCATGTGA
Dingo	Canis lupus dingo	75	ATGGAAACAGCCGTGATTGGAGTGGTGGCAGTGCTGCTTGTGGTCACCGTAGCCATCACCTGCCTCCTCTGCTGCTTCAGCTGTGACTCGAGGGCCCAGGATCCTCAGGGGGGCCCTGGCCACAGCTTCACGGTGGCCACCTTTCGCCAGGAGGCTTCTCTCTTCACAGGGCCGGGTCACCATGCCCAGCCGACGACGGGTGCCCGGGACTTCTGGACCTTCATGTGA
Dog	Canis lupus familiaris	75	ATGGAAACAGCCGTGATTGGAGTGGTGGCAGTGCTGCTTGTGGTCACCGTAGCCATCACCTGCCTCCTCTGCTGCTTCAGCTGTGACTCGAGGGCCCAGGATCCTCAGGGGGGCCCTGGCCACAGCTTCACGGTGGCCACCTTTCGCCAGGAGGCTTCTCTCTTCACAGGGCCGGGTCACCATGCCCAGCCGACGACGGGTGCCCGGGACTTCTGGACCTTCATGTGA
Goat	Capra hircus	75	ATGGAAACAGCAGTGATTGGAATGGTGGCTGTGCTATTCGTGGTCACCGTGGCCATCACCTGTGTCCTCTGCTGCTTCAGCTGTGACTCAAGGAGCCAGGATCCTCAGGGGGCCCCGAGCCCCAGCTTCACAGTAGCCACGTTTCGCCAGGAGGCTTCTCTCTTCACTGGGCCAGGTCGCCATGCTCAGCCAGTGGCAGGTGCCCGGGACTTCTGGACCTTCATGTGA
Tarsier	Carlito syrichta	75	ATGGAAACGGCAGTGATTGGGGTGGTGGCGGTGCTGTTTGTGGTCACCGTGGCCATCACCTGCGTCCTCTGCTGCTTCAGCTGTGACTCGAAGACCCAGGATCCTCAGAGGGGCCCTGGCCGCAGCTTCACCGTGGCCACATTTCGCCGGGAGGCTTCTCTCTTTACAGGGCCTGGTCGCCATGCCCAGCCGGCGCCGAGTGCCCGGGACTTCTGGACCTTCATGTGA
American beaver	Castor canadensis	72	ATGGAAGCAGCAGTGATTGGGGTGGTGGCGGTATTGTTTGTGGTCACCGTGGCCATCACTTGCATCCTCTGCTGCTTCAGCTATGCCTCAGAGACCCAGGATCCTCAACGGGGGCTTGGCCACAGCTTCACAGTAGCTACATTTCACCAGGAGACTTCTTTCTTCACAAGACCTGGTCGCCAAGTGCCAAGTTCCCGGAATGTCTTGACCATCATGTGA
Chacoan peccary	Catagonus wagneri	75	ATGGAAATGGCAGTGATTGGAGTGGTGGCCGTGCTATCCGTGGTCACCGTGGCCATCACCTGTGTCCTCTGCTGCTTCAGCTGTGACTCGAGGGCCCAGGATCCTCAGAGGGGCCCAGGCCACAGCTTCACGGTGGCCACGTTTCGCCAGGAGGCTTCTCTCTTCACGGGGCCAGGTCGCCATGTCCAGCCAGTGGCAGGTGCCCGGGACTTCTGGACCTTCATGTGA
Brazilian guinea pig	Cavia aperea	75	ATGGAAATAATGGTGATTGGGGTGGTGGCAGTGCTCCTTGTGGTCACTGTGGTCATCACCTGTATTCTCTGCTGCTTCAGTTATGACTCGAAGACCCAGGATCCTCAGGGAGGCCCTGGCCGCAGCTTCACAGTGGCCACGTTTCATCAGGAATCTTCTCTCTTCGCCAGGCCTGAGAGCCAAGCCTCGCCGGTGCCGAGGGCCCAGGACTTCTGGACCATTATGTGA
Guinea Pig	Cavia porcellus	75	ATGGAAATAATGGTGATTGGGGTGGTGGCAGTGCTCCTTGTGGTCACTGTGGTCATCACCTGTATTCTCTGCTGCTTCAGTTATGACTCGAAGACCCAGGATCCTCAGGGAGGCCCTGGCCGCAGCTTCACAGTGGCCACGTTTCATCAGGAATCTTCTCTCTTCGCCAGGCCTGAGAGCCAAGCCTCGCCGGTGCTGAGGGCCCAGGACTTCTGGACCATTATGTGA
Capuchin	Cebus capucinus imitator	75	ATGGAAACGGCAGTGATTGGGGTGGTGGCGGTACTGTTTATGGTGACTGTGACCATCACCTGTGTCCTCTGCTGCTTCAGCTGTGACTCGAGGGCCCAGGATCTACAGGGGGCCCCTGGGAGCAGCTTCACGGTGGCCACGTTTCACTGGGAGGCTTCTCTCTTCACGGGGCCTGGTTGCCATGCCCAGCCAGGGCCTAGTGCCCGGGACTTCTGGACCTTCATGTGA
Sooty mangabey	Cercocebus atys	75	ATGGAAACGGCAGTGATTGGGGTGGTGGTGGTGCTGTTCGTGGTGACTGTGGCCATCACCTGCGTCCTCTGCTGCTTCAGCTGTGACTCGAGGGCCCAGGATCCTCAGGGGGGCCCTGGCCGCAGCTTCACGGTGGCCACGTTTCGCCAGGAGGCTTCTCTCTTCACAGGGCCTGGTCGCCATGCCCAGCCAGTGCCGAGTGCCCGGGACTTCTGGACCTTCATGTGA
Yarkand deer	Cervus hanglu yarkandensis	75	ATGGAAGCAGCAGTGATCGGGATGGTGGCTGTGCTCTTTGTGGTCACCGTGGCCATCACCTGCGTCCTCTGCTGCTTCAGCTGTGACTCAAGGAGCCAGGATCCTCAGGGGGCCCCACGCCCCAGCTTCACAGTGGCCACGTTTCGCCAGGAGGCTTCCCTCTTCACTGGGCCAGGTCGCCATGCTCAGCCAGTGGCAGGTGCCCGGGACTTCTGGACCTTCATGTGA
Long-tailed chinchilla	Chinchilla lanigera	75	ATGGAAATTATGGTGGTTGGGGTGGTGGCAGTACTCCTCGTGGTCACCGTGGCCATCGCTTGTATTCTCTGCTGCTTCAGCTATGACTCGAAGACCCAGGATCCTCAGGGAGGCCCTGGTCGCAGCTTCACGGTGGCCACATTTCGCCAAGAGTCTGCTCTCTTCACCAGGCCTGATAGCCACGCCCAGCCAGTGCCGAGGTCGCAGGACTTCTGGACCACCATGTGA
Vervet-AGM	Chlorocebus sabaeus	75	ATGGAAACGGCAGTGATTGGGGTGGTGCTGGTGCTGTTCGTGGTGACTGTGGCCATCACCTGCGTCCTCTGCTGCTTCAGCTGTGACTCGAGGGCCCAGGATCCTCAGGGGGGCCCTGGCCGCAGCTTCACGGTGGCCACGTTTCGCCAGGAGGCTTCTCTCTTCACAGGGCCTGGTCGCCATGCCCAGCCAGTGCCGAGTGCCCGGGACTTCTGGACCTTCATGTGA
Angola colobus	Colobus angolensis palliatus	75	ATGGAAACGGCAGTGATTGGGGTGGTGGTGGTGCTGTTCGTGGTGACTGTGGCCATCACCTGCGTCCTCTGCTGCTTCAGCTGTGATTCGAGGGCCCAGGATCCTCAGGGGGGCCCTGGCCGCAGCTTCACGGTGGCCACGTTTCGCCAGGAGGCTTCTCTCTTCACAGGGCCTGGTCGCCATGCCCAGCCAGTGCCGAGTGCCCGGGACTTCTGGACCTTCATGTGA
Chinese hamster CHOK1GS	Cricetulus griseus	75	ATGGAGACAGCAGTGATTGGAATGGTGGCAGTGCTCTTTGTTGTCACTGTGGCCATCACCTGCATCCTCTGTTACTTCAGCTATGATGCAAAGACCGGTGACCCAGAGAGGGACCCCAGGAACAGCTTCACCGTGGCCACATTTCACCAGGAAGCATCGCTCTTCACAGGGCCTGGTCTCCAATCCCGGCCTTTGCCGAGTGCCCAGAACTTCTGGACTGTTGTGTGA
Armadillo	Dasypus novemcinctus	70	ATGGAGGTGGCCGTGATCGGGGTGGTGGTGGTGCTGTTCGTGGTGACCCTGGCCATCGCCTGCGTCCTCTGCTGCTTCAGCTGCGACCCCAAGACCCACCCCGGCCCCAGCTTCACGGTGGCCACGTTTCGCCAGGAGGCGTCGCTCTTCACGGGGCCGGGCGGCCATGCCCAGCCGGCCGCGGGGTCCCAGGACTTCTGGACCTTCATGTGA
Beluga whale	Delphinapterus leucas	75	ATGGAAACGGCAGTGATTGGAATGGTGGCCGTGCTATTCGTGGTCACCGTGGCCATCAGCTGCATCCTCTGCTGTTTCAGCTGTGACTCAAGGACCCAGGATTCTCAGGGGGGCCTACGCCCCAGCTTCACGGTGGCCACGTTTCGCCAGGAGGCTTCTCTCTCCACGGGGCCAGGTCACCATGTCCAGCCAGTGGCGGGTGTCCGGGACTTCTGGACTTTCATGTGA
Kangaroo rat	Dipodomys ordii	72	ATGGAAACGGCGGTGATTGGGATGGTGGCAGTACTGTTCGTGGTCACTGTGGCCATCACCTGCATCCTCTGCTGCTTCAGCTATGACTCAAAGACGCAGGATCTTCAGGGGGGCCCTGGTCACAGCTTCACGGTAGCCACATTTCACCAAGAGGCTTCTCTCTTCACGGTGCCTGGTCGCCAAGTGTTAAGTGCTGGGGACTTCTGGACCATCATGTGA
Donkey	Equus asinus asinus	75	ATGGAAACGGCAGTGATTGGGGTGGTGATGGTGCTGTTTGCGGTCACCGTGGTCGTCACCTGCATCCTCTGCTGCTTCAGCTGTGACTCGCGGGCCCGGGGTCCTCATGGGGGCCCTGGCCGCAGCTTCACGGTGGCCACCTTTCGTCAGGAGCCTTCTCTCTTCTCTGGGCCAGGGCACCATGCCCAGCCAGTGGGGAGCACCCAGGACTTCTGGACCTTCATGTGA
Horse	Equus caballus	75	ATGGAAACGGCAGTGATTGGGGTGGTGATGGTGCTGTTTGCGGTCACCGTGGTCGTCACCTGCATCCTCTGCTGCTTCAGCTGTGACTCGCGGGCCCGGGGTCCTCATGGGGGCCCTGGCCGCAGCTTCACGGTGGCCACCTTTCGTCAGGAGCCTTCTCTCTTCTCTGGGCCAGGGCACCATGCCCAGCCAGTGGGGAGCACCCAGGACTTCTGGACCTTCATGTGA
Cat	Felis catus	75	ATGGAAACAGCAGTGATCGGAGTGGTGGCCGTGCTGTTTGTGGTCACCGTAGCCATCACCTGCATCCTGTGCTGCTTCAGCTGTGACTCAAGGACCCAGGATCCTCAGGGGGGGCCCGGCCACAGCTTTACAGTGGCCACGTTTTGCCAGGAGGCTTCTTTCTTCACGGGGCCAGGTCACCATGCCCAACCAGTGGTGGGTGCCCGGGACTTCTGGACCTTCATGTGA
Damara mole rat	Fukomys damarensis	75	ATGGAAATACTGGTGGTTGGGGTGGTGGCAGTACTCCTCGGAGTCACCGTGGTCATCGCCTGTATTCTCTGCTGCTTCAGCTATGACTCGAAGACCCAGGATCCTCAGGGAGGCCCTGGCCGCAGCTTTACTGTGGCCACATTTCGTCAAGAATCTTCTCTCTTCACCAGGCCCGATAGACAAGCCCAGCCAGTGCCGAGTGCCCAGGACTTCTGGACCATCATGTGA
Gorilla	Gorilla gorilla gorilla	75	ATGGAAACGGCAGTGATTGGGGTGGTGGTGGTGCTGTTCGTGGTGACTGTGGCCATCACCTGTGTCCTCTGCTGCTTCAGCTGTGACTCGAGGGCCCAGGATCCTCAGGGGGGCCCTGGCCGCAGCTTCACGGTGGCCACGTTTCGCCAGGAAGCTTCTCTCTTCACGGGGCCTGTTCGCCATGCCCAGCCAGTGCCAAGTGCCCAGGACTTCTGGACCTTCATGTGA
Naked mole-rat male	Heterocephalus glaber	75	ATGGAAATAATGGTGATTGGGGTGGTGGCAGTACTCCTCGTAGTCACCGTGGCCATCGCTTGTATTCTCTGCTGCTTCAGCTATGACTCGAAGACCCAGGATCCTCAGGGAGGCCCTGGCCACAGCTTTACGGTGGCCACATTTCGCCAAGAGTCTTCTCTCTTCACCAGGCCTGATAGTCAAGCCCAGCAAGTGCCGAGTGCCCAGGACTTCTGGACCATCATGTGA
Squirrel	Ictidomys tridecemlineatus	73	ATGGAGTCAGCAGTGATTGGGGTGGTGGCGGTACTGTTTGTGTTCACCGTGGCCATCACTTGTATCCTCTGCTGCTTCAGCTATGACTCAAAGACTCAGGATCCTCAGGGAGGCCCTGGCCACAGCTTCACAGTGGCCACATTTCGCCAGGAGGCTTCTCTCTTCTCAGGTCCCCAAGCCCAGTCCATGCGGAGTACCCGGGACTTCTGGACCGTCATTTGA
Lesser Egyptian jerboa	Jaculus jaculus	73	ATGGAAACCGCAGTGATCGGAGTAGTGGCTGTGTTGCTTGTGGTCACCGTGGCCATTGCCTGCCTCCTCTGTTATTTCAGCTTTGATTCGAAGACCCAGGATCTTCAGAAGGACCATGGCTTCACAGTGGCCACGTTTCGCCAGGAAGCATCTCTCTTCACGGGGCCTGCACTCCAAACCCCGCCAGTGAAGAGTACCCAGGACTTCTGGACTGTCATGTGA
Elephant	Loxodonta africana	75	ATGGAAACTGCGGTGATTGGGGTGGTGGCGGTGCTGTTTGTGGTCACTGTGGCCATCACCTGCATCCTCTGCTGCTTCAGCTATGACCCAAAGACCCAGGATCCTCAGGGAGGCCCTGGCCCCAGCTTCACGGTGGCTACATTTCACCAGGAGGCATCTCTCTTCACAGGGCCGGGCCGCCATACCCAGCCGGCAGCTGGTGCCCGGGAATTCTGGACCTTCATGTGA
Crab-eating macaque	Macaca fascicularis	75	ATGGAAACGGCAGTGATTGGGGTGGTGGTGGTGCTGTTCGTGGTGACTGTGGCCATCACCTGCGTCCTCTGCTGCTTCAGCTGTGACTCGAGGGCCCAGGATCCTCAGGGGGGCCCTGGCCGCAGCTTCACGGTGGCCACGTTTCGCCAGGAGGCTTCTCTCTTCACAGGGCCTGGTCGCCATGCCCAGCCAGTGCCGAGTGCCCGGGACTTCTGGACCTTCATGTGA
Macaque	Macaca mulatta	75	ATGGAAACGGCAGTGATTGGGGTGGTGGTGGTGCTGTTCGTGGTGACTGTGGCCATCACCTGCGTCCTCTGCTGCTTCAGCTGTGACTCGAGGGCCCAGGATCCTCAGGGGGGCCCTGGCCGCAGCTTCACGGTGGCCACGTTTCGCCAGGAGGCTTCTCTCTTCACAGGGCCTGGTCGCCATGCCCAGCCAGTGCCAAGTGCCCGGGACTTCTGGACCTTCATGTGA
Pig-tailed macaque	Macaca nemestrina	75	ATGGAAACGGCAGTGATTGGGGTGGTGGTGGTGCTGTTCGTGGTGACTGTGGCCATCACCTGCGTCCTCTGCTGCTTCAGCTGTGACTCGAGGGCCCAGGATCCTCAGGGAGGCCCTGGCCGCAGCTTCACGGTGGCCACGTTTCGCCAGGAGGCTTCTCTCTTCACAGGGCCTGGTCGCCATGCCCAGCCAGTGCCGAGTGCCCGGGACTTCTGGACCTTCATGTGA
Drill	Mandrillus leucophaeus	75	ATGGAAACGGCAGTGATTGGGGTGGTGGTGGTGCTGTTCGTGGTGACTGTGGCCATCACCTGCGTCCTCTGCTGCTTCAGCTGTGACTCGAGGGCCCAGGATCCTCAGGGGGGCCCTGGCCGCAGCTTCACGGTGGCCACGTTTCGCCAGGAGGCTTCTCTCTTCACAGGGCCTGGTCGCCATGCCCAGCCAGTGCCGAGTGCCCGGGACTTCTGGACCTTCATGTGA
Alpine marmot	Marmota marmota marmota	60	ATGGAGTCAGCAGTGATTGGGGTGGTGGCGGTACTGTTTGTGTTCACAGTGGCCATCACTTGTATCCTCTGCTGCTTCAGCTATGACTCAAAGACTCAGGATCCTCAGGGAGGCCCTGGCCACAGCTTCACAGTGGCCACATTTCGCCAGGAGGCTTCTCTCTTCTCAGGTCCCCAAGCCTAG
Mongolian gerbil	Meriones unguiculatus	75	ATGGAGACAGCAGTGATTGGAATGGTGGTAGTGCTGTTTGTCATCACCATGGCCATCACCTGCATCCTCTGCTACTTCAGCTATGACTCAAAGATCCAAGACCCAGCGAGGGGGCCCCGAGGCAGCTTCACCGTGGCCACGTTTCACCAGGAGGCCTCGCTCTTCACAGGGCCTGATCTCCAGTCCCGGCCATTGCCAAGTGCACAGAACTTCTGGACTGTTGTGTGA
Golden Hamster	Mesocricetus auratus	75	ATGGAGACAGCAGTGATTGGAATGGTGGCGGTGCTCCTTGCTGTCACCGTGGTCATCACTTGCATCCTCTGCTACTTCAGCTATGACTCAAAGACCAGTGACCCAGAGATGGGCCCCCGGAACAGCTTCACCGTGGCCACGTTTCACCAGGAAGCGTCCATCTTCACAGGGCCTGGTCTCCAATCCCGGCCATTGCCGACTGCCCGGAACTTCTGTACCGTTGCGTGA
Mouse Lemur	Microcebus murinus	75	ATGGAAACGGCAGTGATTGGGGTGGTTGCGGTGCTGTTTATGGTCACCGTGGCCATCACTTGCATCCTCTGCTGCTTCAGTTGTGACTCAAGGACCCAGCATCCCGAGGGGGGCCCTGGCCGCAGCTTCACGGTGGCCACATTTCGCCAGGAGGCGTCTCTCTTCACAGGGCCCGGCCGCCACGCCCCGCCAGCGCCCAGTGCCCGGGACTTCTGGACCTTCATGTGA
Prairie vole	Microtus ochrogaster	81	ATGGAGATGGCAGTGATCGGAATGGTGGCAGTGCTCTTTGTTGTCACCGTGGCCATCACCTGCGTCCTCTGCTACTTCAGCTACGACCCGAAGACCCAAGACCCAGAGAGAGGGCCCAGGAGCAGCTTCACCGTGGCCACTTTTCACCGGGAAGCCTCGCTCTTCACAGGGCGTGGTCTCCAAGTCCGGCCCCTGCCGAGAGCCCAGAACTTTTCTGGTCTGTCTTGTGAGGCTGGCGGCCCCTAA
Narwhal	Monodon monoceros	75	ATGGAAACGGCAGTGATTGGAATGGTGGCCGTGCTATTCGTGGTCACCGTGGCCATCAGCTGCATCGTCTGCTGTTTCAGCTGTGACTCAAGGACCCAGGGTTCTCAGGGGGGCCTACGCCCCAGCTTCACGGTGGCCACGTTTCGCCGGGAGGCTTCTCTCTCCACGGGGCCAGGTCACCATGTCCAGCCAGTGGCGGGTGTCCGGGACTTCTGGACTTTCATGTGA
Siberian musk deer	Moschus moschiferus	75	ATGGAAACAGCAGTGATCGGAGTGGTGGCTGTGCTATTCGTGGTCACCGTGGCCATCACCTGTGTCCTCTGCTGCTTCAGCTGTGACTCAAGGAGCCAGGATCCTCAGGGGGCCCCGCGTCCCAGCTTCACAGTAGCCACGTTTCGCCAGGAGGCTTCTCTCTTCACTGGGCCAGGTCGCCATGCTCAGCCAGTGGCAGGTGCCCGGGACTTCTGGACCTTCATGTGA
Ryukyu mouse	Mus caroli	75	ATGGAGACAGCGGTGATTGGGATGGTGGCAGTGCTGTTTGTCATCACCATGGCCATTACCTGCATTCTCTGCTACTTCAGCTATGACTCACACACCCAAGACCCAGAGCGCAGCTCCAGACGTAGCTTCACCGTGGCCACGTTTCACCAGGAGGCGTCGCTCTTCACGGGGCCCGCTCTCCAATCCCGGCCACTGCCGAGGGCCCAGAACTTCTGGACTGTTGTGTGA
Mouse	Mus musculus	75	ATGGAGACCGCGGTGATTGGGATGGTGGCAGTGCTTTTTGTCATCACCATGGCCATTACCTGCATCCTCTGCTACTTCAGCTATGACTCACACACCCAAGACCCAGAGCGCAGCTCCAGACGTAGCTTCACCGTGGCCACGTTTCACCAGGAGGCGTCGCTCTTCACGGGGCCGGCTCTCCAATCCCGGCCACTGCCGCGGCCCCAGAACTTCTGGACTGTTGTGTGA
Shrew mouse	Mus pahari	75	ATGGAGACAGCGGTGATTGGGATGGTGGCAGTGCTGTTAGTCATCACTATGGCCATTACCTGCATCCTCTGCTACTACAGCTATGACTCACAGACCCAAGACCCAGAGAGGGGCCCCAGACGTAGCTTCACCGTGGCCACGTTTCACCAGGAGGCGTCGCTCTTCACGGGGCCGGCTCTTCAATCCCGGCCACTGCCGAGGGCCCAGAACTTCTGGACTGTTGTGTGA
Steppe mouse	Mus spicilegus	75	ATGGAGACAGCGGTGATTGGGATGGTGGCTGTGCTTTTTGTCATCACCATGGCCATTACCTGCATCCTCTGCTACTTCAGCTATGACTCACACACCCAAGACCCAGAGCGCAGCTCCAGGCGTAGCTTCACCGTGGCCACGTTTCACCAGGAGGCGTCGCTCTTCACGGGGCCGGCTCTCCAATCCCGGCCACTGCCGAGGGCCCAGAACTTCTGGACTGTTGTGTGA
Algerian mouse	Mus spretus	75	ATGGAGACAGCGGTGATTGGGATGGTGGCAGTGCTTTTTGTCATCACCATGGCCATTACCTGCATCCTCTGCTACTTCAGCTATGACTCACACACCCAAGACCCAGAGCGCAGCTCCAGGCGTAGCTTCACCGTGGCCACGTTTCACCAGGAGGCGTCGCTCTTCACGGGGCCGGCTCTCCAATCCCGGCCACTGCCGAGGGCCCAGAACTTCTGGACTGTTGTGTGA
Ferret	Mustela putorius furo	77	ATGGAAACAGCAGTGATTGGAGTGGTGGCGGTGCTGTTTGTGGTCACCGTAGCCATCACCTGCCTCCTGTGCTGTTTCAGCTGTGACTCGAGGGCCCAGGATCCTCAGGGGGGCCCTGGCCACAGCTTCACGGTGGCCACGTTTCGCCAGGAGGCTTCTCTCTTCACGGGCCCGGGTCGCCATGCCCAGCCTGCAGCGGCGGTGGGTGCCCGGGACTTCTGGACCTTCATGTGA
Microbat	Myotis lucifugus	75	ATGGAGACGGCGGTGATCGGCATGGTGGCCGTGCTGTTTGTGCTCACCGTGGCCATCACCTGCATCCTCTGCTGCTTCAGCTGTGAATCGAAGGCCCCGGATCCTCAGGGGGGCCCTGGCCGCAGCTTCACTGTGGCCACGTTCCACCAGGAGGCTTCTCTCTTCACGGGGCCGGCTCGCCATGCCCAGGCAGTGGCGGGTGCCCGGGACTTCTGGACCTTCATGTGA
Upper Galilee mountains blind mole rat	Nannospalax galili	75	ATGGAAGCGGCAGTGATTGGAATGGTGGCTATGCTGTTTGTGGTCACCATTGCCATCACCTGCATCCTCTGTTACTTCAGCTATGACTCGAAGACCCAAGATCCTCAGAGGGGACCCAGCTACAGCTTCACAGTGGCCACATTTCACCAGGAAGCATCTCTCTTCACAGGGCCTGGTATCCAAACCAGGCCAATGCCGAATGCCCAGAACTTCTGGACTGTCACGTGA
American mink	Neovison vison	77	ATGGAAACAGCAGTGATTGGAGTGGTGGCGGTGCTGTTTGTGGTCACCGTAGCCATCACCTGCCTCCTGTGCTGTTTCAGCTGTGACTCGAGGGCCCAGGATCCTCAGGGGGTCCCTGGCCACAGCTTCACGGTGGCCACGTTTCGCCAGGAGGCTTCTCTCTTCACAGGCCCGGGTCGCCATGCCCAGCCTGCAGCGGCGGTAGGTGCCCGGGACTTCTGGACCTTCATGTGA
Degu	Octodon degus	75	ATGGAAATACTGGTGATTGGGGTGGTGGCAGTACTCCTCTTGGTCACCGTGGTCATCACCTGTATTCTCTGCTGCTTCAGCTATGATTCGAAGACCCAGGATCCTCAGGGAGGCCCTGGCCACAGCTTCACAGTGGCTACGTTTCGTCGAGAGTCTTCTTTCTTCACCAGGACTGAGAGCCGAGCCCAGCCACTGCAGAGTTCCCAGGACTTCTGGATCACTATGTGA
Rabbit	Oryctolagus cuniculus	75	ATGGAAACGGCAGTGATTGGGGTGGTGGCAGTGCTGCTCCTGGTCACTGTGGCCGTCACCTGCATCCTGTGCTGCTTCAGCTGTGACTCGAGGAACCCGGATCCTGAGGAGGGCCCTGGCCACAGCTTCACGGTGGCCACATTTCGCCGGGAGGCGTCCCTCTTCACGGGGCCCAATCGCCAAACCCAGCCAGGGCCGAGTGCTCGGGACTTCTGGTCCTTCATGTGA
Bushbaby	Otolemur garnettii	75	ATGGAGACGGCAGTGATTGGGGTGGTACTGGTGTTGTTCGTGGTCACTGTGGCCATCACCTGCGTCCTCTGCTGCTTCAGCTGTGACTCAAGGATCCAGCATCCTCAGGGGGGTCCTGGCCACAGCTTCACCGTGGCCACATTTCGCCAGGAGGCTTCTCTCTTCACCGGGCCTGACCGCCACTCCCTGCCAGCACCAAGTGCCCGGGACTTCTGGACCTTCATGTGA
Sheep	Ovis aries	75	ATGGAAACAGCAGTGATCGGAATGGTGGCTGTGCTATTCATGGTCACCGTGGCCATCACCTGTGTCCTCTGCTGCTTCAGCTGTGACTCAAGGAGCCAGGATCCTCAGGGGGCCCCGAGCCCCAGCTTCACAGTAGCCACGTTTCGCCAGGAGGCTTCTCTCTTCACTGGGCCAGGTCGCCATGCTCAGCCAGTGGCAGGTGCCCGGGACTTCTGGACCTTCATGTGA
Bonobo	Pan paniscus	75	ATGGAAACGGCAGTGATTGGGGTGGTGGTGGTGCTGTTCGTGGTGACTGTGGCCATCACCTGCGTCCTCTGCTGCTTCAGCTGTGACTCAAGGTCCCAGGATCCTCAGGGGGGTCCTGGCCGCAGCTTCACGGTGGCCACGTTTCGCCAGGAAGCTTCTCTCTTCTCGGGGCCTGTTCGCCATGCCCAGCCAGTGCCAAGTGCCCAGGACTTCTGGACCTTCATGTGA
Chimpanzee	Pan troglodytes	75	ATGGAAACGGCAGTGATTGGGGTGGTGGTGGTGCTGTTCGTGGTGACTGTGGCCATCACCTGCGTCCTCTGCTGCTTCAGCTGTGACTCAAGGTCCCAGGATCCTCAGGGGGGTCCTGGCCGCAGCTTCACGGTGGCCACGTTTCGCCAGGAAGCTTCTCTCTTCTCGGGGCCTGTTCGCCATGCCCAGCCAGTGCCAAGTGCCCAGGACTTCTGGACCTTCATGTGA
Lion	Panthera leo	75	ATGGAAACAGCAGTGATTGGAGTGGTGGCCGTGCTGTTTGTGGTCACCGTAGCCATCACCTGCATCCTGTGCTGCTTCAGCTGTGACTCAAGGACCCAGGATCCTCAGGGGGGCCCCGGCCACAGCTTTACAGTGGCCACGTTTTGCCAGGAGGCTTCTTTCTTCACGGGGCCAGGTCACCATGCCCAACCAGTGGTGGGTGCTCGGGACTTCTGGACCTTCATGTGA
Leopard	Panthera pardus	75	ATGGAAACAGCAGTGATCGGAGTGGTGGCCGTGCTGTTTGTGGTCACCGTAGCCATCACCTGCATCCTGTGCTGCTTCAGCTGTGACTCAAGGACCCAGGATCCTCAGGGGGGCCCCGGCCACAGCTTTACAGTGGCCACGTTTTGCCAGGAGGCTTCTTTCTTCACGGGGCCAGGTCACCATGCCCAACCAGTGGTGGGTGCCCGGGACTTCTGGACCTTCATGTGA
Tiger	Panthera tigris altaica	75	ATGGAAACAGCAGTGATCGGAGTGGTGGCCGTGCTGTTTGTGGTCACCGTAGCCATCACCTGCATCCTGTGCTGCTTCAGCTGTGACTCAAGGACCCAGGATCCTCAGGGGGGCCCCGGCCACAGCTTTACAGTGGCCACGTTTTGCCAGGAGGCTTCTTTCTTCACGGGGCCAGGTCACCATGCCCAACCAGTGGTGGGTGCCCGGGACTTCTGGACCTTCATGTGA
Olive baboon	Papio anubis	75	ATGGAAACGGCAGTGATTGGGGTGGTGGTGGTGCTGTTCGTGGTGACTGTGGCCATCACCTGTGTCCTCTGCTGCTTCAGCTGTGACTCGAGGGCCCAGGATCCTCAGGGGGGCCCTGGCCGCAGCTTCACGGTGGCCACGTTTCGCCAGGAGGCGTCTCTCTTCACAGGGCCTGGTCGCCATGTCCAGCCAGTGCCGAGTGCCCGGGACTTCTGGACCTTCATGTGA
Northern American deer mouse	Peromyscus maniculatus bairdii	75	ATGGAGACCGCAGTGATCGGGATGGTGGCAGTGCTGTTCATTGTCACCATGGCCATCACCTGCATCCTCTGCTACTTCAGCTATGACTTGAAGACCCAAGACCCAGACAGGGACCCCAGGAACAGCTTCACCGTGGCCACATTTCACCAGGAGGCTTCGCTCTTCACAGGGCCTGCTCTCCAATCCCGGCCATTGCTGAGTGCCCAGAACTTCTGGACTGTTGTGTGA
Vaquita	Phocoena sinus	75	ATGGAAACGGCAGTGATTGGAATGGTGGCCGTGCTATTTGTGGTCACCGTGACCATCAGCTGCATCCTCTGCTGTCTCAGCTGTGACTCAAGGACCCAGGATTCTCAGGGGGGCCCACGCCCCAGCTTCACGGTGGCCACGTTTCGCCAGGAGGCTTCTCTCTCCACGGGGCCAGGTCACCATGTCCAGCCAGTAGCAGGTGTCCGGGACTTCTGGACTTTCATGTGA
Sperm whale	Physeter catodon	75	ATGGAAACGGCAGTGATTGGAATGGTGGCCGTGCTATTTGTGGTCACCGTGGCCATCACCTGCATCCTCTGCTGTTTCAGCTGTGACTCAAGGACCCCGGATTCTCAGGGGGGCCCACGCCCCAGCTTCACAGTGGCCACGTTTCACCAGGAGGCTTCTGTCTTCACGGGGCCAGGTCACCATGCCCAGCCAGTGGCGGGTGTCCGGGACTTCTGGACGTTCATGTGA
Ugandan red Colobus	Piliocolobus tephrosceles	75	ATGGAAACGGCAGTGATTGGGGTGGTGGTGGTGCTGTTCGTGGTGACTGTGGCCATAACCTGCGTCCTCTGCTGCTTCAGCTGTGATTCGAGGGCCCAGGATCCTCAGGGGGGCCCTGGCCGCAGCTTCACGGTGGCCACGTTTCGCCAGGAGGCTTCTCTCTTCACAGGGCCTGGTCGCCATGCCCAGCCAGTGCCGAGTGCCCGGGACTTCTGGACCTTCATGTGA
Hyrax	Procavia capensis	71	ATGGAAACGGTGGTGATTGGGGTGGTGGTGGTGCTGTTCCTGGTCACCGTAGTCATCACCTGCATCCTCTGCTGCTTTACCTGTGACCCAAAGACCCAGGATCCTCAGGGAGGCCCTGGCTCCAGCTTCACAGTGGCCACATTTCACCAGGAGGCATCCCTCTTCACAGGGCTGGGCCGCCATAGCCAGCTGGCAGCAGGAGCTTGGGACTTCTAG
Greater bamboo lemur	Prolemur simus	75	ATGGAAACGGCAGTGATTGGGGTGGTGGTGGTGCTGTTTATGGTCACTGTGGCCATCACCTGTGTCCTCTGCTGCTTCAGCTGTGACTCAAGGACCCAGCATCCTCAGGGGGGCCCTGGCCGCAGCTTCACGGTGGCCACGTTTCGCCAGGAGGCGTCTCTCTTCACGGGGCCCAGTCGCCACGCCCCGCCAGCGCCCAGTGCCCGAGACTTCTGGACCTTCATGTGA
Coquerel's sifaka	Propithecus coquereli	75	ATGGAAACGGCAGTGATTGGAGTGGTGGCGGTGCTGTTTATGGTCACCGTGGCTATCACCTGTGTCCTCTGCTGCTTCAGCTGTGACTCAAGGACCCAGCATCCTCAGGGGGGCCCTGGCCGCAGATTCACGGTGGCCACGTTTCGCCAGGAGGCGACTCTCTTCACAGGGCCGGGCCGCCACGCCCCGCCAGTGCCTAGTGCCCGGGACTTCTGGACCTTCATGTGA
Megabat	Pteropus vampyrus	75	ATGGAAACGGCAGTGATTGGCATGGTGGCAGTGCTGTTTGTGGTCACTGTGGCCATCACCTGTGTCCTCTGCTGCTTCAGCTGTGACTCAAGGGCCCAGGATCCTCAGGAGGGCCCTGGCCGCAGCTTCACAGTGGCCACGTTTCGCCGGGAGGCTTGTCTCTTCACTGGGCCAGGTCGCCATGTCCAGCCAGTGGCGGGTGCCCGGGACTTCTGGACCTTCATGTGA
Rat	Rattus norvegicus	75	ATGGAGACAGCGGTGATTGGGATGGTGGTAGTGCTGTTTGTCATCACCATGGCCATTACCTGCATCCTCTGCTACTTCAGCTATGACTCACACAACCAAGACGCAGAGAGCGGCCCCAGACGTAGCTTCACTGTGGCCACGTTTCACCAGGAGGCGTCGCTCTTCACGGGGCCGGCTCTCCAATCCCGGCCACTGCCGAGGGCCCAGAACTTCTGGACTGTTGTGTGA
Greater horseshoe bat	Rhinolophus ferrumequinum	75	ATGGAAACGGCAGTGATTGGCATGGTGGCAGTGCTGTTTGTGGTCACCCTGGCCATCACCTGCATCCTCTGCTGCTTCAGCTGTGACTCAAGGACCCAGAATCCTCAGGGGGGCCCGGGCCACAGCTTCACAGTGGCCACGTTTCGCCAGGAGGCTTTTCTCTTCACAGGGCCAGCTCGTCACACCCAGCCAGTGGCCAGTGCCCGGGACTTCTGGACCTTCATGTGA
Black snub-nosed monkey	Rhinopithecus bieti	75	ATGGAAACGGCAGTGATTGGGGTGGTGGTGGTGCTGTTCGTGGTGACTGTGGCCATCACCTGCGTCCTCTGCTGCTTCAGCTGTGACTCGAGGGCCCAGGATCCTCAGGGGGGCCCTGGCCGCAGCTTCACGGTGGCCACGTTTCGCCAGGAGGCTTCTCTCTTCACAGGGCCTGGTCGCCATGCCCAGCCAGTGCCGAGTGCCCGGGACTTCTGGACCTTCATGTGA
Golden snub-nosed monkey	Rhinopithecus roxellana	75	ATGGAAACGGCAGTGATTGGGGTGGTGGTGGTGCTGTTCGTGGTGACTGTGGCCATCACCTGCGTCCTCTGCTGCTTCAGCTGTGACTCGAGGGCCCAGGATCCTCAGGGGGGCCCTGGCCGCAGCTTCACGGTGGCCACGTTTCGCCAGGAGGTTTCTCTCTTCACAGGGCCTGGTCGCCATGCCCAGCCAGTGCCGAGTGCCCGGGACTTCTGGACCTTCATGTGA
Tasmanian devil	Sarcophilus harrisii	78	ATGGAAACCATGGTAATGGGGATGATTCTGACTTTATTTGCTATTATATTAGTTACCTTTTGTATTCTCTGCTGGTCTAGCTATAACAAAACCCCATGGAATCAACACCAAGAGAGTATCCCAAACTTTACTTTGGCCACTTTCCACAGGGAAGCTTCTCTTATTGTAAGACCTACTGGTCAGCATTCTAATTCCCACTCATCAACCAACCAAAGGAATTTCTTTTCCTTTATGTGA
Eurasian red squirrel	Sciurus vulgaris	73	ATGGAGTCGGCGGTGATTGGGGTGGTGGCGGTACTGTTTGTGTTCACAGTGGCCATCACCTGTATCCTATGCTGCTTCAGCTATGACTCAAAGACCCAGGATCCTCAGGGAGGCCCTGGCCACAGCTTCACGGTGGCCACATTTCGCCAGGAGGCTTCTCTCTTCACAGGTCCCCAAGCCCAGTCAGTGCCTAGTACCCGGGACTTCTGGACTGTCATATGA
Daurian ground squirrel	Spermophilus dauricus	73	ATGGAGTCAGCAGTGATTGGGGTGGTGGCGGTACTGTTTGTGTTCACCGTGGCCATCACTTGTATCCTCTGCTGCTTCAGCTATGACTCAAAGACTCAGGATCCTCAGGGAGGCCCTGGCCACAGCTTCACAGTGGCCACATTTCGCCAGGAGGTTTCTCTCTTCTCAGGTCCCCAAGCCCAGTCCATGCCAAGTACCCGGGACTTCTGGAACGTCATTTGA
Pig	Sus scrofa	75	ATGGAAACGGCTGTGATTGGAGTGGTGGCCGTGCTGTTTGTGGTCACCGTGGCCATCACCTGCGTCCTCTGTTGCTTCAGCTGTGACTCGAGGGCCCGGGATCCTCAGAGGGGCCCAGGCCACAGCTTCACGGTGGCCACGTTTCGCCAGGAGGCTTCTCTCTTCACGGGGCCAGGTTGCCATATCCAACCAGTGGCGGGTGCCCGGGACTTCTGGACCTTCATGTGA
Gelada	Theropithecus gelada	75	ATGGAAACGGCAGTGATTGGGGTGGTGGTGGTGCTGTTCGTGGTGACTGTGGCCATCACCTGCGTCCTCTGCTGCTTCAGCTGTGACTCGAGGGCCCAGGATCCTCAGGGGGGCCCTGGCCGCAGCTTCACGGTGGCCACGTTTCGCCAGGAGGCTTCTCTCTTCACAGGGCCTGGTCGCCATGCCCAGCCAGTGCCGAGTGCCCGGGACTTCTGGACCTTCATGTGA
Tree Shrew	Tupaia belangeri	75	ATGGAAACGGCAGTGATTGGGGTGGTGGCTGTGCTGTTCGTGGCCACTGTGGCCATCACCTGCATCCTCTGCTGCTTCAGTTGTGATTCAAGGACCCAGGACCCTCAGGGGGGCCCTGACCGCAGCTTCACAGTGGCCACGTTTCACCAGGAGGCCTCCCTCTTCACTGGGCCCAGTCGCCATGCCCACTCGATGCCGAGTGCCCGGGAATTCTGGACCTTCATATGA
Arctic ground squirrel	Urocitellus parryii	73	ATGGAGTCAGCAGTGATTGGGGTGGTGGCGGTACTGTTTGTGTTCACCGTGGCCATCACTTGTATCCTCTGCTGCTTCAGCTATGACTCAAAGACTCAGGATCCTCAGGGAGGCCCTGGCCACAGCTTCACAGTGGCCACATTTCGCCAGGAGGCTTCTCTCTTCTCAGGTCCCCAAGCCCAGTCCATGCGGAGTACCCAGGACTTCTGGACCGTCATTTGA
American black bear	Ursus americanus	78	ATGGAAACAGCAGTGATTGGAGTGGTGGCGGTGCTGTTTCTGGTCACCGTAGCCATCACCTGCCTCCTCTGCTGCTTTAGCTGTGACTCGAGGGCCCTAGATCCTCAGGGGGGCCCTGGCCACAGCTTCACGGTGGCCACATTTCACCAGGAGGCTTCTCTCTTCACGGGGCCGGGTTGCCATGCCCAGCCGGTGGCGGCGACGGCGGGTGCCCGGGACTTCTGGACCTTCATGTGA
Polar bear	Ursus maritimus	78	ATGGAAACAGCAGTGATTGGAGTGGTGGCGGTGCTGTTTCTGGTCACCGTAGCCATCACCTGCCTCCTCTGCTGCTTTAGCTGTGACTCGAGGGCCCTAGATCCTCAGGGGGGCCCTGGCCACAGCTTCACGGTGGCCACATTTCACCAGGAGGCTTCTCTCTTCACGGGGCCGGGTCGCCATGCCCAGCCGGTGGCGGCGACGGCGGGTGCCCGGGACTTCTGGACCTTCATGTGA
Common wombat	Vombatus ursinus	77	ATGGAAACCATGGTGGTGGGGGTGATCCTGACTTTATTTGCTATTATATTGGTGACTTTTTGTATCCTCTGCTGGTCCAGCTACAACAAATCCCCCTGGAATCAGCACCAAGATAGTATCCCAAACTTTACTTTGGTCACTTTCCACAGGGAAGCTTCATTTGTAAGACCTACTGGTCAGCATGCTAATGCCCATTCATCCCCCAACCAAAGGAATTTATTTTCCTTTATGTGA
Red fox	Vulpes vulpes	75	ATGGAAACAGCCGTGATTGGAGTGGTGGCAGTGCTGCTTGTGGTCACCGTAGCCATCACCTGCCTCCTCTGCTGCTTCAGCTGTGACTCGAGGGCCCAGGATCCTCAGGGGGGCCCTGGCCACAGCTTCACGGTGGCCACCTTTCGCCAGGAGGCTTCTCTCTTCACAGGGCCGGGTCACCATGCCCAGCCGACAACGGGTGCCCGGGACTTCTGGACCTTCATGTGA

## Sheet: Table S8
Table S8: StringTie SPAAR transcript predictions in opossum and platypus heart tissue
Species	Chromosome	Feature	Start	Stop	Strand	Attributes
Opossum	6	transcript	134824569	134829233	-	gene_id "STRG.1154"; transcript_id "STRG.1154.1"; cov "23.817282"; FPKM "83.839218"; TPM "158.419266";
Opossum	6	exon	134824569	134829233	-	gene_id "STRG.1154"; transcript_id "STRG.1154.1"; exon_number "1"; cov "23.817282";
Opossum	6	transcript	134826649	134838842	-	gene_id "STRG.1154"; transcript_id "STRG.1154.2"; cov "21.269321"; FPKM "74.870148"; TPM "141.471664";
Opossum	6	exon	134826649	134828113	-	gene_id "STRG.1154"; transcript_id "STRG.1154.2"; exon_number "1"; cov "25.973709";
Opossum	6	exon	134828795	134828887	-	gene_id "STRG.1154"; transcript_id "STRG.1154.2"; exon_number "2"; cov "19.643579";
Opossum	6	exon	134831199	134831286	-	gene_id "STRG.1154"; transcript_id "STRG.1154.2"; exon_number "3"; cov "20.902515";
Opossum	6	exon	134838476	134838842	-	gene_id "STRG.1154"; transcript_id "STRG.1154.2"; exon_number "4"; cov "2.990158";
Opossum	6	transcript	134826649	134838842	-	gene_id "STRG.1154"; transcript_id "STRG.1154.3"; cov "10.357150"; FPKM "36.458206"; TPM "68.889984";
Opossum	6	exon	134826649	134828113	-	gene_id "STRG.1154"; transcript_id "STRG.1154.3"; exon_number "1"; cov "12.601309";
Opossum	6	exon	134831199	134831286	-	gene_id "STRG.1154"; transcript_id "STRG.1154.3"; exon_number "2"; cov "10.140987";
Opossum	6	exon	134838476	134838842	-	gene_id "STRG.1154"; transcript_id "STRG.1154.3"; exon_number "3"; cov "1.450694";
Opossum	6	transcript	134826649	134838842	-	gene_id "STRG.1154"; transcript_id "STRG.1154.4"; cov "3.456705"; FPKM "12.167949"; TPM "22.992073";
Opossum	6	exon	134826649	134828113	-	gene_id "STRG.1154"; transcript_id "STRG.1154.4"; exon_number "1"; cov "4.217940";
Opossum	6	exon	134828795	134828887	-	gene_id "STRG.1154"; transcript_id "STRG.1154.4"; exon_number "2"; cov "3.189974";
Opossum	6	exon	134838476	134838842	-	gene_id "STRG.1154"; transcript_id "STRG.1154.4"; exon_number "3"; cov "0.485580";
Platypus	X5	transcript	22404313	22424390	+	gene_id "STRG.817"; transcript_id "STRG.817.4"; cov "22.402536"; FPKM "266.324860"; TPM "465.476562";
Platypus	X5	exon	22404313	22404575	+	gene_id "STRG.817"; transcript_id "STRG.817.4"; exon_number "1"; cov "6.555963";
Platypus	X5	exon	22405456	22405637	+	gene_id "STRG.817"; transcript_id "STRG.817.4"; exon_number "2"; cov "17.350367";
Platypus	X5	exon	22405718	22406081	+	gene_id "STRG.817"; transcript_id "STRG.817.4"; exon_number "3"; cov "27.103910";
Platypus	X5	exon	22420943	22424390	+	gene_id "STRG.817"; transcript_id "STRG.817.4"; exon_number "4"; cov "23.381607";
Platypus	X5	transcript	22407186	22424390	+	gene_id "STRG.817"; transcript_id "STRG.817.7"; cov "17.131138"; FPKM "203.657654"; TPM "355.948242";
Platypus	X5	exon	22407186	22416988	+	gene_id "STRG.817"; transcript_id "STRG.817.7"; exon_number "1"; cov "6.832347";
Platypus	X5	exon	22420943	22424390	+	gene_id "STRG.817"; transcript_id "STRG.817.7"; exon_number "2"; cov "46.411606";
